# Supplementary material
Source: publisher figshare collection journal article supplement (https://gsapubs.figshare.com/articles/dataset/_/20349552)
Supplement: Supplementary file 2 [file 1]

## **Critical metal enrichment in crustal melts: the role of metamorphic mica**

*Barbara E. Kunz, Clare J. Warren, Frances E. Jenner, Nigel B.W. Harris, Tom W. Argles*

*Contact: [barbara.kunz@open.ac.uk](mailto:barbara.kunz@open.ac.uk)*

### **APPENDIX 1. Sample descriptions**

#### Sikkim

SK-10-12 is an arkosic metasediment containing ~1–2 mm clasts of quartz and plagioclase wrapped by a fine-grained matrix comprising chlorite (5%) and muscovite (40%).

SK-10-15 is a fine-grained (~100 µm) phyllite with a strong planar fabric, containing an assemblage of chlorite (25%) muscovite (45%) and quartz with accessory zircon, xenotime, allanite and ilmenite.

SK-10-16 is a fine-grained crenulated schist containing quartz, muscovite (50%), biotite (10%), garnet, staurolite, chlorite (5%) and plagioclase with accessory ilmenite and apatite. Pressure shadows around garnet are filled with quartz, and staurolites lie parallel to the foliation.

SK-10-17 is a medium-grained schist containing quartz, muscovite (25%), biotite (15%), chlorite (5%), K-feldspar, garnet and plagioclase with accessory ilmenite, apatite, rutile and tourmaline. The phyllosilicate grains are mostly aligned with the fabric although subordinate clusters of muscovite and biotite lie oblique.

SK-10-19 is a coarse schist containing quartz, muscovite (25%), biotite (25%), chlorite (2%) and garnet with accessory ilmenite, rutile, apatite and tourmaline. ~0.5 mm muscovite grains cross-cut the main foliation formed of smaller grains of muscovite and biotite.

SK-10-20 is a coarse schist containing quartz, muscovite (20%), biotite (20%), chlorite (5%), plagioclase, K-feldspar and garnet with accessory ilmenite, apatite and rutile.

SK-10-21 is a coarse schist containing quartz, muscovite (25%), biotite(10%), garnet and quartz with few accessory phases.

SK-10-22 is a coarse-grained schist that contains quartz, plagioclase, muscovite (20%), biotite (10%), garnet (with mica inclusions), kyanite, sillimanite and staurolite with accessory tourmaline, ilmenite, rutile, and apatite.

Overall, Si ions per formula unit (pfu) in muscovite range from 6.2- 6.42 and Ti ranges from 0.03-0. Na/(Na+K) ranges from 0.02-0.2. Si pfu in biotite ranges from 5.52-6.25 and Ti ranges from 0.37-0.5. The full datasets are presented in Mottram et al., (2014a,b).

#### Langtang

N13 is a muscovite garnet schist that contains muscovite (25%), garnet, quartz, plagioclase and minor biotite (1-2%).

N2 is a muscovite biotite garnet schist that contains muscovite (25%), biotite (25%), garnet, quartz and plagioclase.

N5 and N11 are biotite sillimanite migmatitic gneisses containing biotite, garnet, sillimanite, quartz and K-feldspar. N5 contains more biotite and sillimanite (25% each) than N11 (15% biotite and sillimanite only in the leucosome).

Si ions per formula unit (pfu) in muscovite in these samples range from 5.8-6.1 and Ti from 0.08-0.17. Na/(Na+K) ranges from 0.06-0.12. Si pfu in biotite ranges from 5.1-5.9 and Ti ranges from 0.15-0.46. Average compositions of muscovite and biotite per sample are presented in Table S2.

#### Ivrea Zone

IZ 410 is a folded augen gneiss containing quartz, plagioclase, biotite (40%), muscovite (7%) and sillimanite with accessory apatite, zircon and monazite.

IZ 418 is a foliated gneiss containing quartz, plagioclase, biotite (30%) and sillimanite with minor muscovite (<5%) and accessory zircon, monazite, apatite, hematite and pyrite.

IZ 419 is biotite gneiss containing quartz, plagioclase, biotite (40%), sillimanite, muscovite (<5%) and minor tourmaline and accessory monazite, xenotime, apatite, ilmenite, graphite, zircon hematite and pyrite.

IZ 420 is a biotite gneiss containing plagioclase + quartz + garnet + biotite (35%) + sillimanite, muscovite (<2%) and minor tourmaline and accessory monazite, xenotime, apatite, ilmenite, graphite, zircon and pyrite.

IZ 421 is a biotite-muscovite gneiss containing plagioclase + quartz + garnet + biotite (30%) + sillimanite, with muscovite (<5%) and accessory zircon, monazite, xenotime, apatite, ilmenite, graphite, and hematite and pyrite.

IZ 422 is a coarse-grained gneiss containing plagioclase + quartz + garnet + biotite (40%) + K-feldspar + sillimanite with minor remnant muscovite and graphite and accessory zircon, apatite, monazite, hematite and pyrite.

IZ 409 is a banded gneiss with coarser and finer-grained layers. It contains quartz + plagioclase + garnet + biotite (25%) + K-feldspar + sillimanite and accessory zircon, apatite, monazite, ilmenite, hematite and pyrite.

IZ 407 is a highly strained, fine-grained gneiss containing quartz + plagioclase + garnet + biotite (20%) + K-feldspar + sillimanite and accessory zircon, apatite, monazite, graphite, rutile, hematite and pyrite.

IZ 406A is a restitic garnet-sillimanite gneiss containing plagioclase + garnet + sillimanite + K-feldspar + quartz with minor biotite (5%) and accessory zircon, rutile, and monazite.

IZ 405 is a restitic gneiss containing mainly quartz + plagioclase + garnet + K-feldspar + sillimanite with minor biotite (5%) and accessory zircon, rutile, graphite, monazite, ilmenite and pyrite.

Si ions per formula unit (pfu) in muscovite range from 6.1- 6.3 and Ti ranges from 0.06-0.12. Na/(Na+K) ranges from 0.11-0.2. Si pfu in biotite ranges from 5.2-5.9 and Ti ranges from 0.17-0.74. The full dataset is presented in Table S2.

# APPENDIX 2. Mineral assemblages

|                   | Qtz | Kfs | Pl | Mu  | Bt  | Grt | Sil | Tur | St | Chl | Accesory                 | Opaque           | peak T estimate (°C) | Coordiantes (WGS84) |           |
|-------------------|-----|-----|----|-----|-----|-----|-----|-----|----|-----|--------------------------|------------------|----------------------|---------------------|-----------|
| Sikkim Himalaya   |     |     |    |     |     |     |     |     |    |     |                          |                  |                      | Lat.                | Lon.      |
| <b>SK-10-12</b>   | x   |     | x  | x   |     |     |     |     |    | x   | Aln, Ap, Mnz, Xtm, Zrn   | Ilm              | 400*                 | 27.0135             | 88.422817 |
| <b>SK-10-15</b>   | x   |     |    | x   |     |     |     |     |    | x   | Aln, Xtm, Zrn            |                  | 440*                 | 27.012133           | 88.4036   |
| <b>SK-10-16</b>   | x   |     |    | x   | x   | x   |     |     |    | x   | (Aln), Ap, Mnz, Xtm, Zrn |                  | 573*                 | 27.012767           | 88.3809   |
| <b>SK-10-17</b>   | x   | x   | x  | x   | x   | x   |     | x   |    | x   | Aln, Ap, Mnz, Xtm, Zrn   | Ilm              | 559*                 | 27.015817           | 88.373383 |
| <b>SK-10-19</b>   | x   |     |    | x   | x   | x   |     | x   |    | x   | Aln, Mnz, Zrn            | Ilm              | 674*                 | 27.021917           | 88.359267 |
| <b>SK-10-20</b>   | x   | x   | x  | x   | x   | x   |     |     |    | x   | Aln, Mnz, Zrn            | Ilm              | 697*                 | 27.031767           | 88.353117 |
| <b>SK-10-21</b>   | x   |     |    | x   | x   | x   |     |     |    |     | Aln, Ap, Mnz, Xtm, Zrn   |                  | 688*                 | 27.037533           | 88.350683 |
| <b>SK-10-22</b>   | x   |     | x  | x   | x   | x   | x   | x   | x  |     | Ap, Mnz, Xtm, Zrn, Rt    | Ilm, Fe-oxides   | 668*                 | 27.0333             | 88.342    |
| Langtang Himalaya |     |     |    |     |     |     |     |     |    |     |                          |                  |                      |                     |           |
| <b>N2</b>         | x   | x   | x  | x   | x   | x   |     | (x) |    |     | Ap, Zrn, Mnz,            | Gr               | 680*                 | 28.0934             | 85.2531   |
| <b>N13</b>        | x   | x   | x  | x   | x   | x   |     |     |    |     | Mnz, Zrn, Ttn, (Ap)      | Ilm              | 591*                 | 28.0923             | 85.2524   |
| <b>N5</b>         | x   | x   |    | x   | x   | x   | x   |     |    |     | Zrn, Mnz, Ap             |                  | 797*                 | 28.1102             | 85.2629   |
| <b>N11</b>        | x   | x   | x  | x   | x   | x   | x   |     |    |     | Mnz, Zrn                 | Ilm              | 726*                 | 28.1141             | 85.2655   |
| Ivrea Zone, Italy |     |     |    |     |     |     |     |     |    |     |                          |                  |                      |                     |           |
| <b>IZ 410</b>     | x   |     | x  | x   | x   |     | x   |     |    |     | Ap, Zrn, Mnz             |                  | 690**                | 45.897391           | 8.383102  |
| <b>IZ 418</b>     | x   |     | x  | x   | x   |     | x   |     |    |     | Ap, Zrn, Mnz             | Hem, Py          | 710**                | 45.903955           | 8.37376   |
| <b>IZ 419</b>     | x   |     | x  | x   | x   |     | x   | x   |    |     | Mnz, Xtm, Ap, (Zrn)      | Py, Hem, Ilm, Gr | 720**                | 45.904829           | 8.35601   |
| <b>IZ 420</b>     | x   |     | x  | x   | x   | x   | x   | x   |    |     | Mnz, Ap, Xtm, (Zrn)      | Gr, Ilm, Py      | 730**                | 45.908179           | 8.348429  |
| <b>IZ 421</b>     | x   |     | x  | x   | x   | x   | x   |     |    |     | Zrn, Mnz, Ap, Xtm        | Gr, Ilm, Hem     | 740**                | 45.906435           | 8.32853   |
| <b>IZ 422</b>     | x   | x   | x  | (x) | x   | x   | x   |     |    |     | Ap, Zrn, Mnz             | Hem, Gr, Py      | 750**                | 45.911661           | 8.31293   |
| <b>IZ 409</b>     | x   | x   | x  |     | x   | x   | x   |     |    |     | Ap, Zrn, Mnz, Rt?        | Ilm, Py, Hem, Gr | 780**                | 45.919968           | 8.296591  |
| <b>IZ 407</b>     | x   | x   | x  |     | x   | x   | x   |     |    |     | Ap, Zrn, Mnz             | Ilm, Py, Gr      | 850**                | 45.932201           | 8.290993  |
| <b>IZ 406A</b>    | x   | x   | x  |     | (x) | x   | x   |     |    |     | Rt, Zrn, Mnz             |                  | 910**                | 45.934553           | 8.264404  |
| <b>IZ 405</b>     | x   | x   | x  |     | x   | x   | x   |     |    |     | Zrn, Mnz, Rt             | Ilm, Py, Gr      | 940**                | 45.932372           | 8.24738   |

x = present

(x) = rare

\* Ti-in-Bt (calibration from Wu et al., 2015)

\*\*Thermocalc (Taken from Kunz & White, 2019)

### APPENDIX 3. Detailed method description for LA-ICP-MS analysis

#### Major element analysis

Major element concentrations in Sikkim (SK) sample micas were taken from Mottram et al. (2014). Those for the Ivrea Zone (IZ) and Langtang (N) sample micas were analysed on a Cameca SX100 5-spectrometer wavelength dispersive electron microprobe at the Open University, UK. The spectrometers were calibrated using a selection of synthetic and natural standards. The analyses were collected under operating conditions of a 20 nA beam, 20 kV accelerating current and a 10  $\mu\text{m}$  beam size. Data are reported in Table S4.

Temperatures for the SK and N samples were calculated using the Ti-in-biotite thermometer calibration of Wu & Chen (2015) using the mean Ti concentrations measured by EMPA. Temperatures for the IZ samples are taken from Kunz & White (2019), and were calculated from  $P$ - $T$  pseudosection modelling in THERMOCALC and Zr-in-rutile thermometry (Luvizotto & Zack, 2009).

#### Trace element analysis

Concentrations of 45 trace (and nine major) elements were measured *in-situ* in muscovite and biotite in thick polished sections by LA-ICP-MS using a Photon Machines Analyte G2 193 nm excimer laser system, equipped with a HelEx II 2-volume cell, coupled to an Agilent 8800 ICP-QQQ-MS at the Open University, UK. Analyses were carried out with a 10 Hz repetition rate, 3.6 J/cm<sup>2</sup> fluence and a 50  $\mu\text{m}$  spot size. Ablated material was transported in 0.9 l/min He carrier gas mixed with ~0.77 l/min Ar in a down-flow mixing bulk.

Each measurement included 30 s of background measurement prior to ablation, 30s of sample analysis during ablation, and a 40 s washout after ablation ended. Sample analyses were bracketed by analyses of standard reference SRM-NIST 612 (primary for traces, secondary for majors) and BCR-2G (secondary for traces, primary for majors) every 10-12 analyses. Major element concentrations were compared to those measured on the EMPA for further consistency checks. BCR-2G analyses are within 3–10% of preferred values (Jenner and O'Neill, 2012) and long-term lab averages (see Table S4).

The data were reduced using the Iolite software v3.71. Mica analyses were standardised to <sup>29</sup>Si concentrations measured in the same or nearby grains in the same polished sections by EMPA. Due to the low concentration of major elements in NIST glasses, Mg, Na, Al, Fe, Ti, Mn, Ca, K concentrations were standardised to BCR-2G; all other trace elements were standardised to NIST612. Raw signals were screened for mis-identification of mica variety (muscovite, chlorite, biotite and sillimanite) or for 3D effects causing mixing during drilling using the Mg, Fe and Al concentrations.

| Laboratory & Sample Preparation |                                                                          |
|---------------------------------|--------------------------------------------------------------------------|
| Laboratory name                 | School of Environment, Earth and Ecosystem Sciences, Open University, UK |
| Sample type/mineral             | muscovite & biotite                                                      |
| Sample preparation              | 60 $\mu\text{m}$ polished thick sections                                 |
| Laser ablation system           |                                                                          |
| Make, Model & type              | Photon Machines Analyte G2 193 nm excimer laser                          |
| Ablation cell & volume          | HelEx II 2-volume cell                                                   |
| Laser wavelength (nm)           | 193 nm                                                                   |
| Pulse width (ns)                | 4 ns                                                                     |
| Fluence (J.cm <sup>-2</sup> )   | 3.63 J.cm <sup>-2</sup>                                                  |

|                                                                   |                                                                                                                                                                                                                                                                                                                                                                                                                                                                                                                                                                                                                                                                                                                                                                                                                                                                                                                                                                                                                                                                                                                                                                                                                                                                                                                                                                                        |
|-------------------------------------------------------------------|----------------------------------------------------------------------------------------------------------------------------------------------------------------------------------------------------------------------------------------------------------------------------------------------------------------------------------------------------------------------------------------------------------------------------------------------------------------------------------------------------------------------------------------------------------------------------------------------------------------------------------------------------------------------------------------------------------------------------------------------------------------------------------------------------------------------------------------------------------------------------------------------------------------------------------------------------------------------------------------------------------------------------------------------------------------------------------------------------------------------------------------------------------------------------------------------------------------------------------------------------------------------------------------------------------------------------------------------------------------------------------------|
| Repetition rate (Hz)                                              | 10 Hz                                                                                                                                                                                                                                                                                                                                                                                                                                                                                                                                                                                                                                                                                                                                                                                                                                                                                                                                                                                                                                                                                                                                                                                                                                                                                                                                                                                  |
| Ablation duration (s)                                             | 30 s                                                                                                                                                                                                                                                                                                                                                                                                                                                                                                                                                                                                                                                                                                                                                                                                                                                                                                                                                                                                                                                                                                                                                                                                                                                                                                                                                                                   |
| Spot diameter (mm)<br>nominal/actual                              | 50 mm                                                                                                                                                                                                                                                                                                                                                                                                                                                                                                                                                                                                                                                                                                                                                                                                                                                                                                                                                                                                                                                                                                                                                                                                                                                                                                                                                                                  |
| Sampling mode / pattern                                           | Static spot ablation                                                                                                                                                                                                                                                                                                                                                                                                                                                                                                                                                                                                                                                                                                                                                                                                                                                                                                                                                                                                                                                                                                                                                                                                                                                                                                                                                                   |
| Carrier gas                                                       | 100% He in the cell, Ar make-up gas combined in a mixing bulb<br>down stream                                                                                                                                                                                                                                                                                                                                                                                                                                                                                                                                                                                                                                                                                                                                                                                                                                                                                                                                                                                                                                                                                                                                                                                                                                                                                                           |
| Cell carrier gas flow (l/min)                                     | 0.9 l/min He                                                                                                                                                                                                                                                                                                                                                                                                                                                                                                                                                                                                                                                                                                                                                                                                                                                                                                                                                                                                                                                                                                                                                                                                                                                                                                                                                                           |
| <b>ICP-MS Instrument</b>                                          |                                                                                                                                                                                                                                                                                                                                                                                                                                                                                                                                                                                                                                                                                                                                                                                                                                                                                                                                                                                                                                                                                                                                                                                                                                                                                                                                                                                        |
| Make, Model & type                                                | Agilent 8800 ICP-QQQ-MS                                                                                                                                                                                                                                                                                                                                                                                                                                                                                                                                                                                                                                                                                                                                                                                                                                                                                                                                                                                                                                                                                                                                                                                                                                                                                                                                                                |
| Sample introduction                                               | Ablation aerosol in He & Ar gas mix                                                                                                                                                                                                                                                                                                                                                                                                                                                                                                                                                                                                                                                                                                                                                                                                                                                                                                                                                                                                                                                                                                                                                                                                                                                                                                                                                    |
| RF power (W)                                                      | 1250 W                                                                                                                                                                                                                                                                                                                                                                                                                                                                                                                                                                                                                                                                                                                                                                                                                                                                                                                                                                                                                                                                                                                                                                                                                                                                                                                                                                                 |
| Ar carrier gas flow (l/min)                                       | 0.77 l/min                                                                                                                                                                                                                                                                                                                                                                                                                                                                                                                                                                                                                                                                                                                                                                                                                                                                                                                                                                                                                                                                                                                                                                                                                                                                                                                                                                             |
| Detection system                                                  | Dual-mode discrete dynode electron multiplier                                                                                                                                                                                                                                                                                                                                                                                                                                                                                                                                                                                                                                                                                                                                                                                                                                                                                                                                                                                                                                                                                                                                                                                                                                                                                                                                          |
| Masses measured; Integration<br>time per peak/dwell times<br>(ms) | <sup>7</sup> Li 0.005, <sup>9</sup> Be 0.005, <sup>23</sup> Na 0.002, <sup>24</sup> Mg 0.005, <sup>27</sup> Al 0.002, <sup>29</sup> Si<br>0.002, <sup>31</sup> P 0.01, <sup>39</sup> K 0.005, <sup>43</sup> Ca 0.005, <sup>45</sup> Sc 0.005, <sup>49</sup> Ti 0.005, <sup>51</sup> V<br>0.005, <sup>53</sup> Cr 0.005, <sup>55</sup> Mn 0.005, <sup>56</sup> Fe 0.005, <sup>59</sup> Co 0.005, <sup>60</sup> Ni<br>0.005, <sup>65</sup> Cu 0.005, <sup>66</sup> Zn 0.005, <sup>71</sup> Ga 0.005, <sup>74</sup> Ge 0.005, <sup>85</sup> Rb<br>0.005, <sup>88</sup> Sr 0.005, <sup>89</sup> Y 0.005, <sup>90</sup> Zr 0.005, <sup>93</sup> Nb 0.01, <sup>95</sup> Mo 0.01,<br><sup>111</sup> Cd 0.01, <sup>115</sup> In 0.01, <sup>118</sup> Sn 0.01, <sup>121</sup> Sb 0.02, <sup>133</sup> Cs 0.02, <sup>137</sup> Ba<br>0.01, <sup>139</sup> La 0.01, <sup>140</sup> Ce 0.01, <sup>141</sup> Pr 0.01, <sup>146</sup> Nd 0.01, <sup>147</sup> Sm 0.01,<br><sup>153</sup> Eu 0.01, <sup>157</sup> Gd 0.01, <sup>159</sup> Tb 0.01, <sup>163</sup> Dy 0.01, <sup>165</sup> Ho 0.01, <sup>166</sup> Er<br>0.01, <sup>169</sup> Tm 0.01, <sup>172</sup> Yb 0.01, <sup>175</sup> Lu 0.01, <sup>177</sup> Hf 0.01, <sup>181</sup> Ta 0.01,<br><sup>182</sup> W 0.02, <sup>205</sup> Tl 0.02, <sup>208</sup> Pb 0.02, <sup>209</sup> Bi 0.02, <sup>232</sup> Th 0.01, <sup>238</sup> U 0.01 |
| Total integration time (s)                                        | 0.6566                                                                                                                                                                                                                                                                                                                                                                                                                                                                                                                                                                                                                                                                                                                                                                                                                                                                                                                                                                                                                                                                                                                                                                                                                                                                                                                                                                                 |
| <b>Data Processing</b>                                            |                                                                                                                                                                                                                                                                                                                                                                                                                                                                                                                                                                                                                                                                                                                                                                                                                                                                                                                                                                                                                                                                                                                                                                                                                                                                                                                                                                                        |
| Gas blank                                                         | 30 seconds                                                                                                                                                                                                                                                                                                                                                                                                                                                                                                                                                                                                                                                                                                                                                                                                                                                                                                                                                                                                                                                                                                                                                                                                                                                                                                                                                                             |
| Washout                                                           | 40 seconds                                                                                                                                                                                                                                                                                                                                                                                                                                                                                                                                                                                                                                                                                                                                                                                                                                                                                                                                                                                                                                                                                                                                                                                                                                                                                                                                                                             |
| Calibration strategy                                              | SRM-NIST 612 (primary for traces, secondary for majors),<br>BCR-2G (secondary for traces, primary for majors) every 10-12<br>analyses                                                                                                                                                                                                                                                                                                                                                                                                                                                                                                                                                                                                                                                                                                                                                                                                                                                                                                                                                                                                                                                                                                                                                                                                                                                  |
| Reference Material info                                           | SRM-NIST 612 (Jenner and O'Neill, 2012)<br>BCR-2G (Jenner and O'Neill, 2012 & in house long-term<br>averages)                                                                                                                                                                                                                                                                                                                                                                                                                                                                                                                                                                                                                                                                                                                                                                                                                                                                                                                                                                                                                                                                                                                                                                                                                                                                          |
| Data processing package used                                      | Iolite v3.71; DRS: X_Trace_Elements_IS; internal standard <sup>29</sup> Si                                                                                                                                                                                                                                                                                                                                                                                                                                                                                                                                                                                                                                                                                                                                                                                                                                                                                                                                                                                                                                                                                                                                                                                                                                                                                                             |
| Uncertainty level & Quality<br>control / Validation               | BCR-2G within 3-10% of the preferred value depending on<br>element concentration and homogeneity of secondary standard.<br>Major element concentrations obtained by LA-ICP-MS were<br>compared to those measured by EMPA for consistency checks<br>and data defines on a 1:1 line                                                                                                                                                                                                                                                                                                                                                                                                                                                                                                                                                                                                                                                                                                                                                                                                                                                                                                                                                                                                                                                                                                      |

## References

- Jenner, F. E., & O'Neill, H. S. C. (2012) Major and trace analysis of basaltic glasses by laser-ablation ICP-MS. *Geochemistry, Geophysics, Geosystems*, 13(3)
- Kunz, B. E., & White, R. W. (2019) Phase equilibrium modelling of the amphibolite to granulite facies transition in metabasic rocks (Ivrea Zone, NW Italy). *Journal of Metamorphic Geology*, 37, 935–950
- Luvizotto, G. L., & Zack, T. (2009) Nb and Zr behavior in rutile during high-grade metamorphism and retrogression: an example from the Ivrea–Verbano Zone. *Chemical Geology*, 261, 303–317

- Mottram, C.M., Warren, C.J., Regis, D., Roberts, N.M.W., Harris, N.B.W., Argles, T.W. & Parrish, R.R. (2014) Developing an inverted Barrovian sequence; insights from monazite petrochronology. *Earth and Planetary Science Letters*, 403, 418–431
- Wu, C. M., & Chen, H. X. (2015) Revised Ti-in-biotite geothermometer for ilmenite-or rutile-bearing crustal metapelites. *Science Bulletin*, 60, 116–121
