# Supplementary material
Source: publisher figshare collection journal article supplement (https://gsapubs.figshare.com/articles/dataset/_/20349552)

SK-10-12

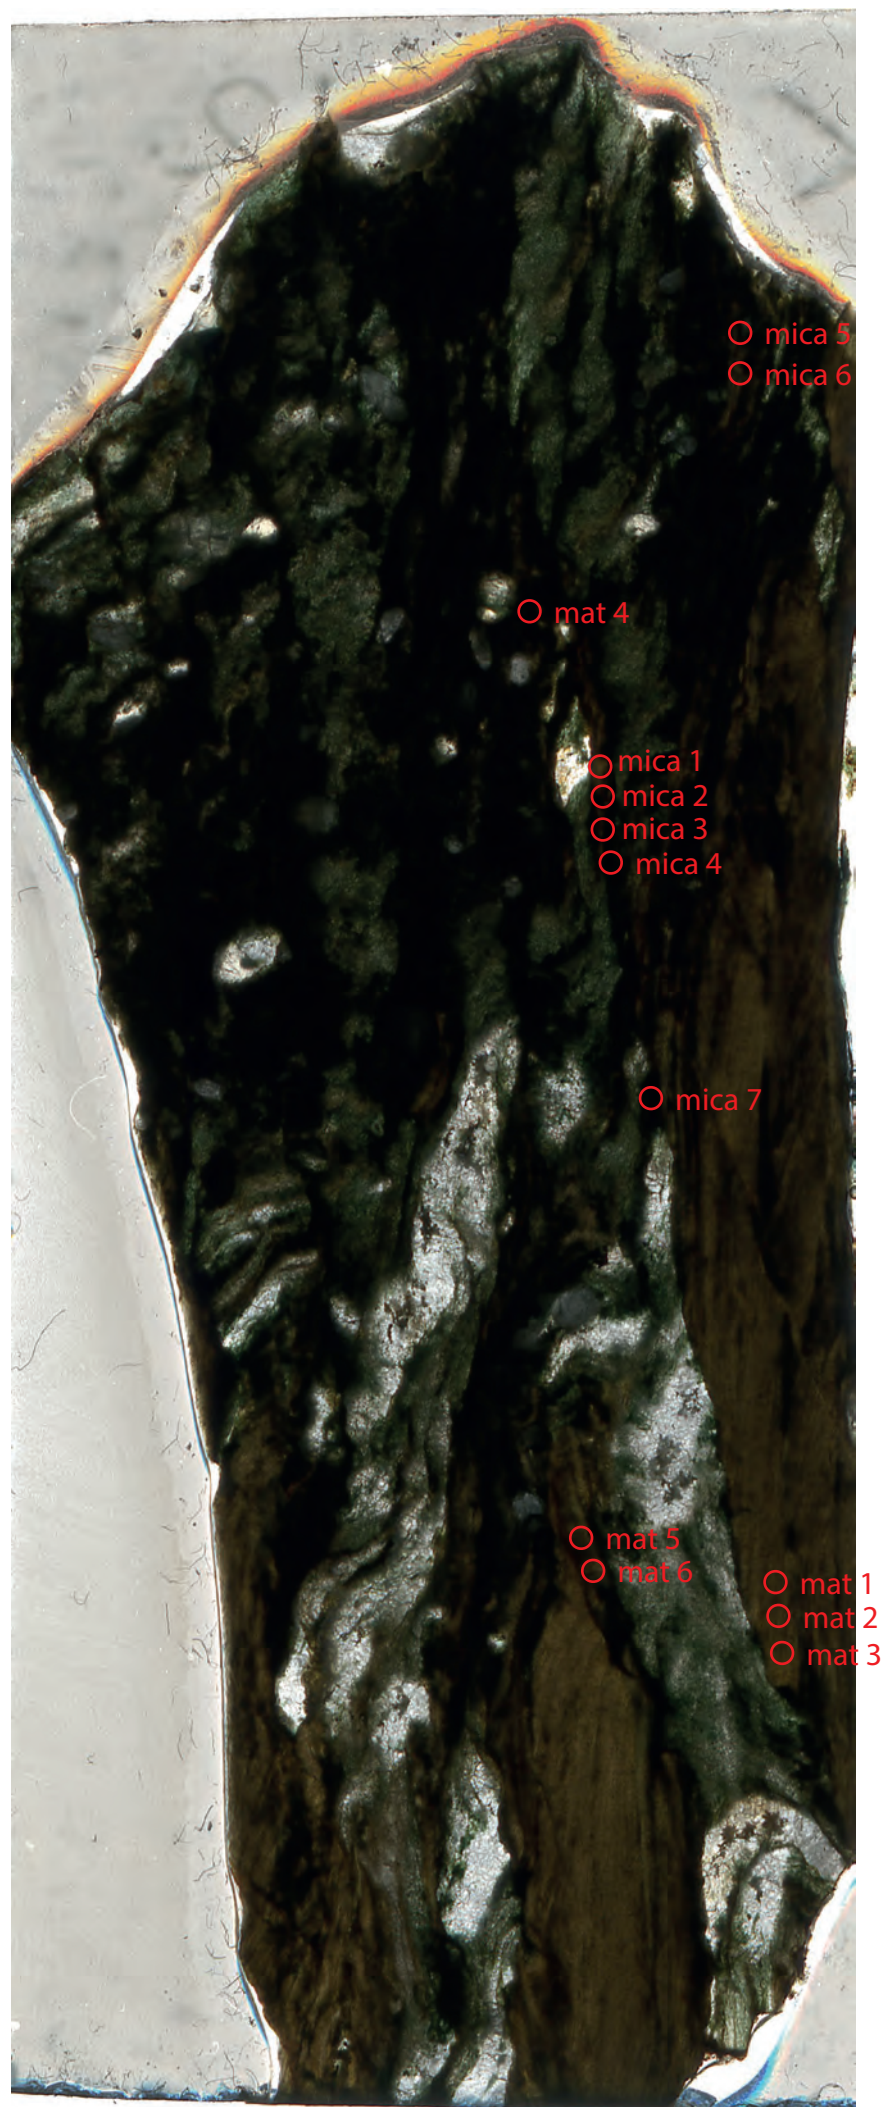



SK-10-15

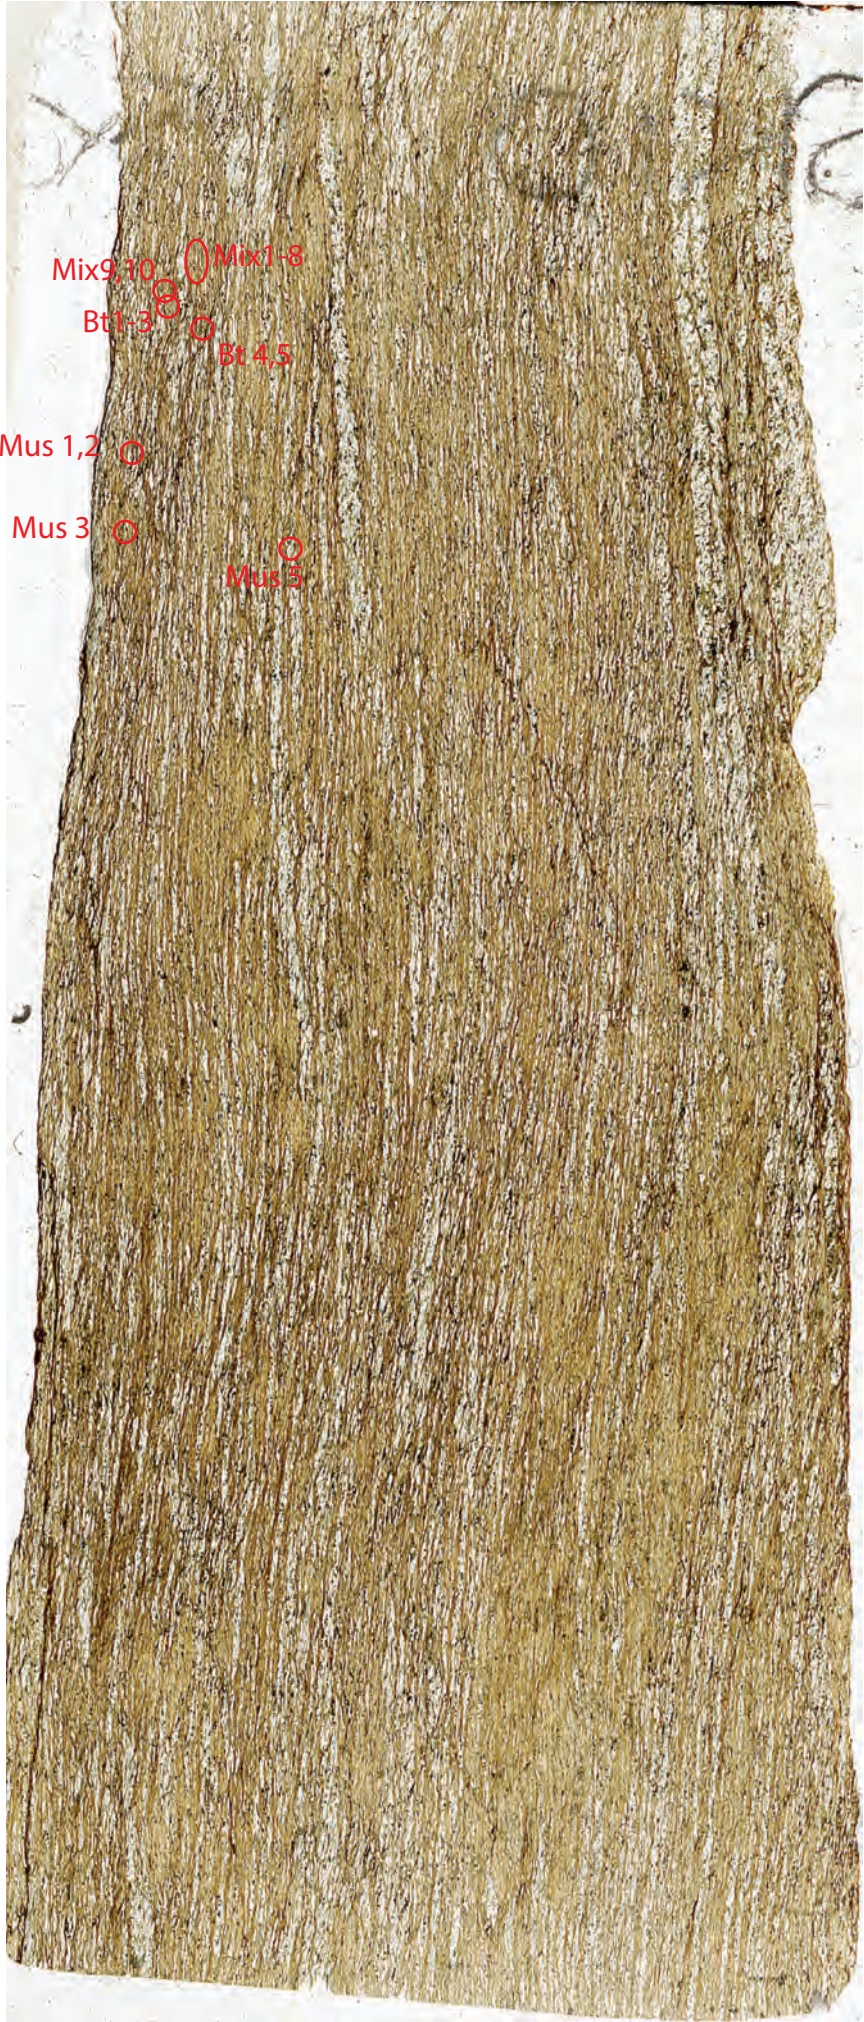



SK-10-16

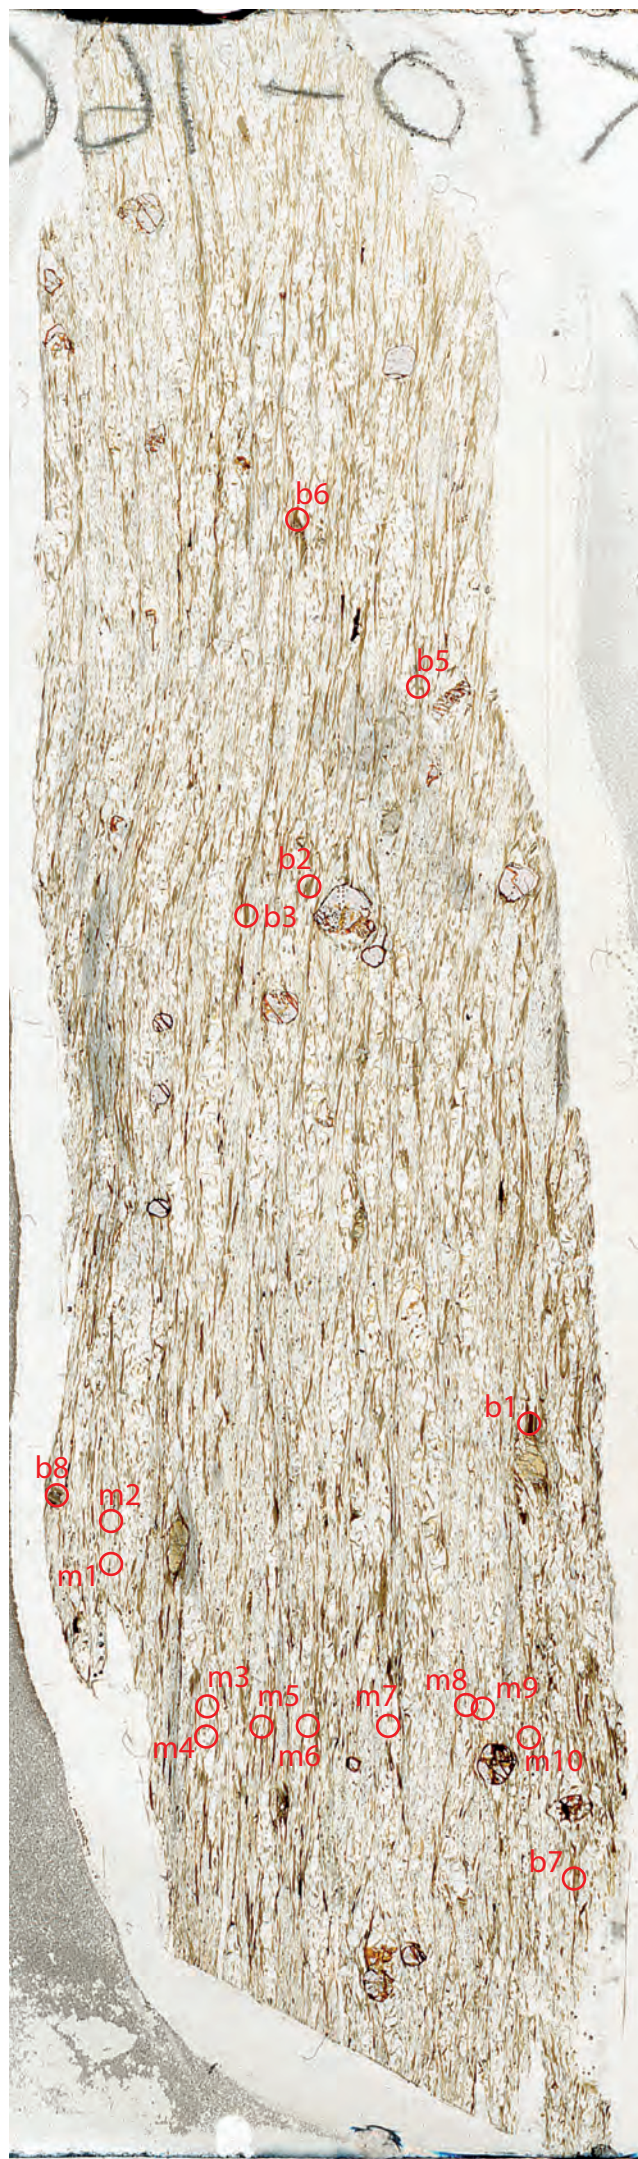



SK-10-17

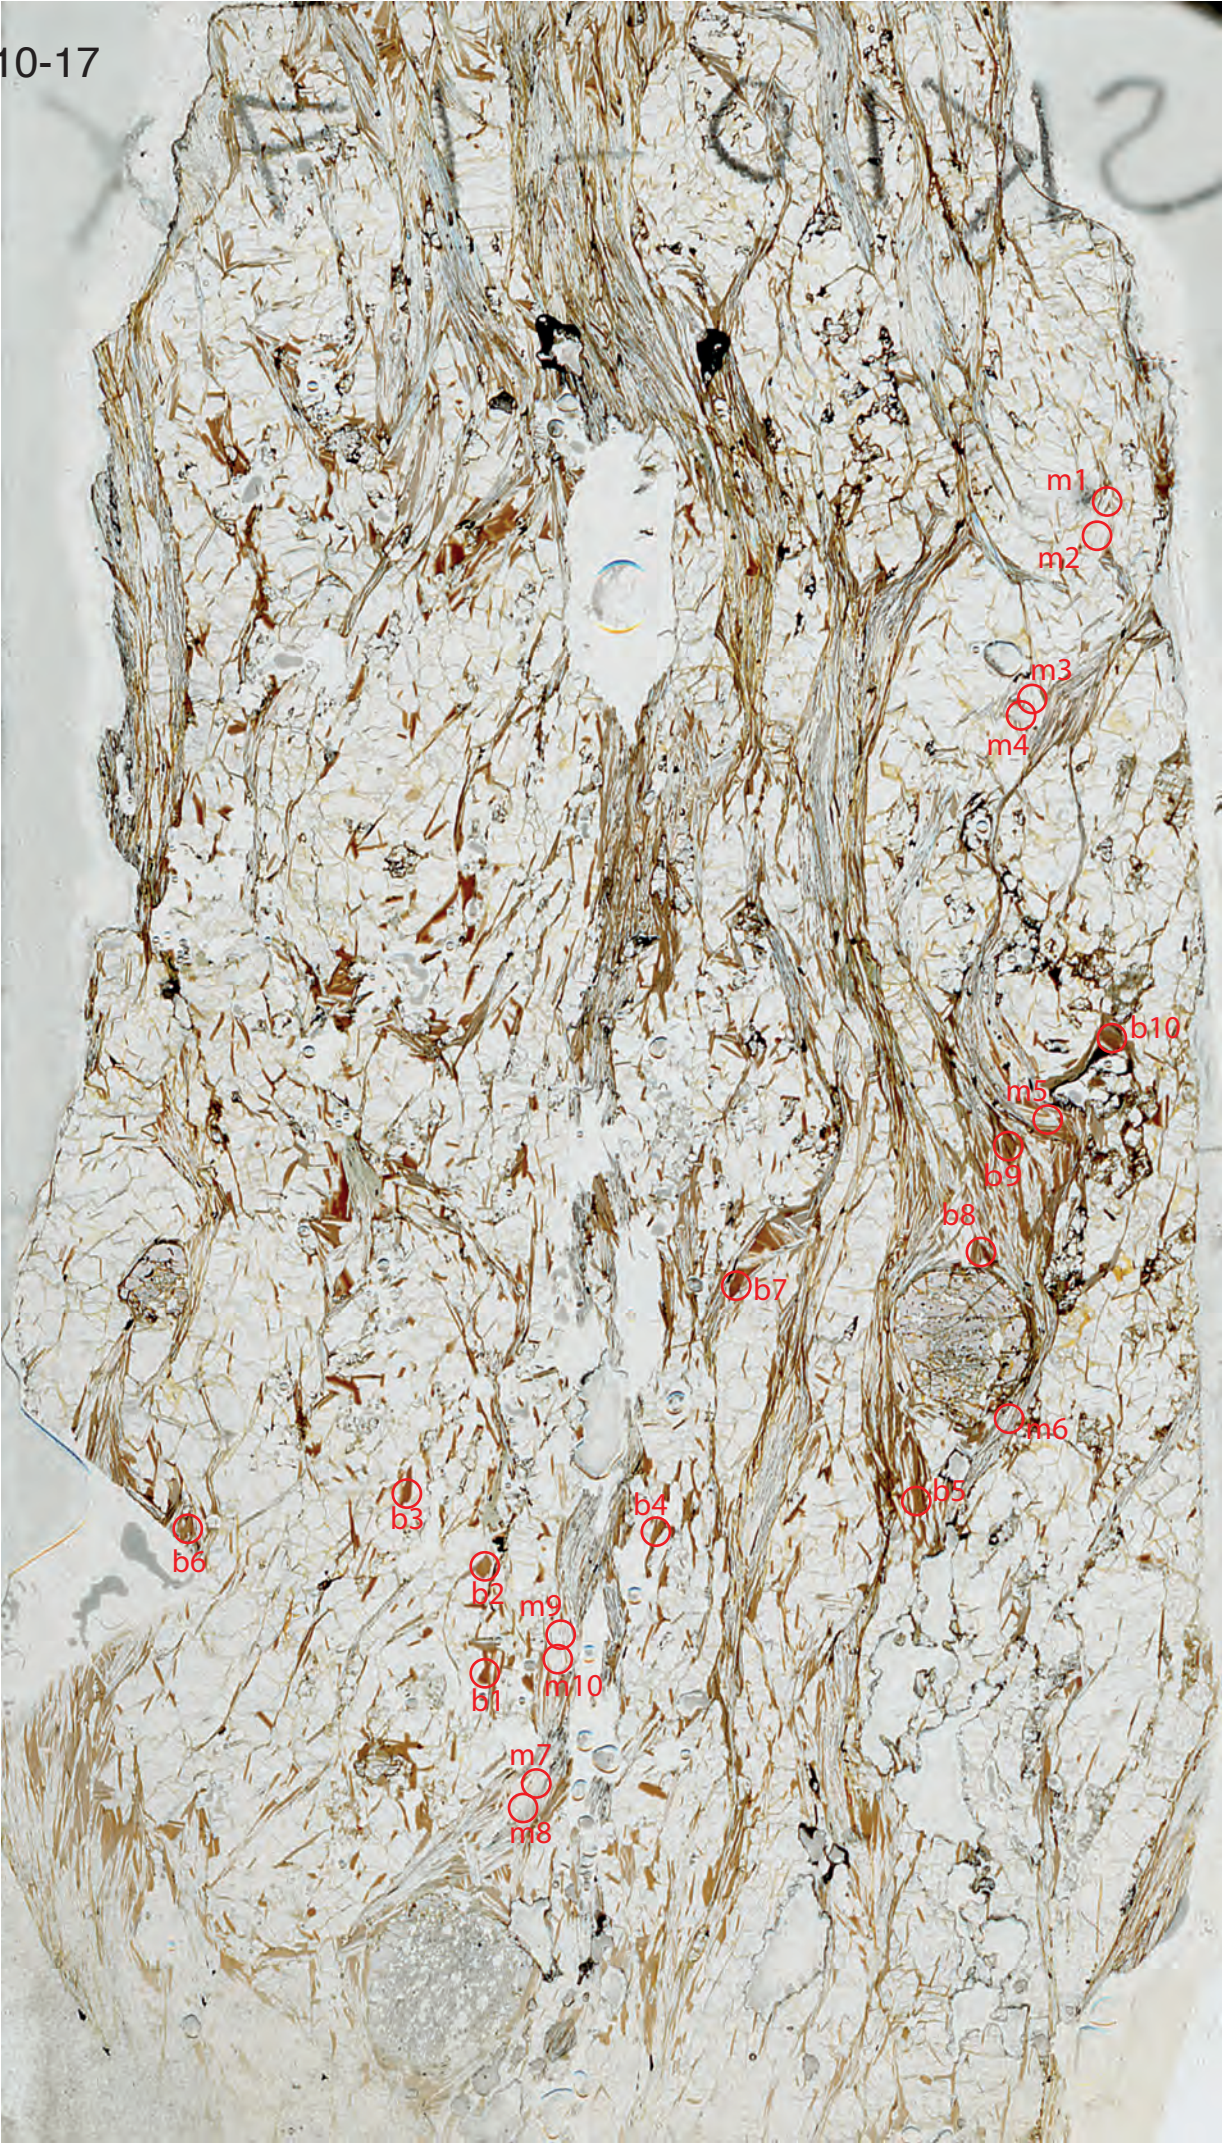



SK-10-19

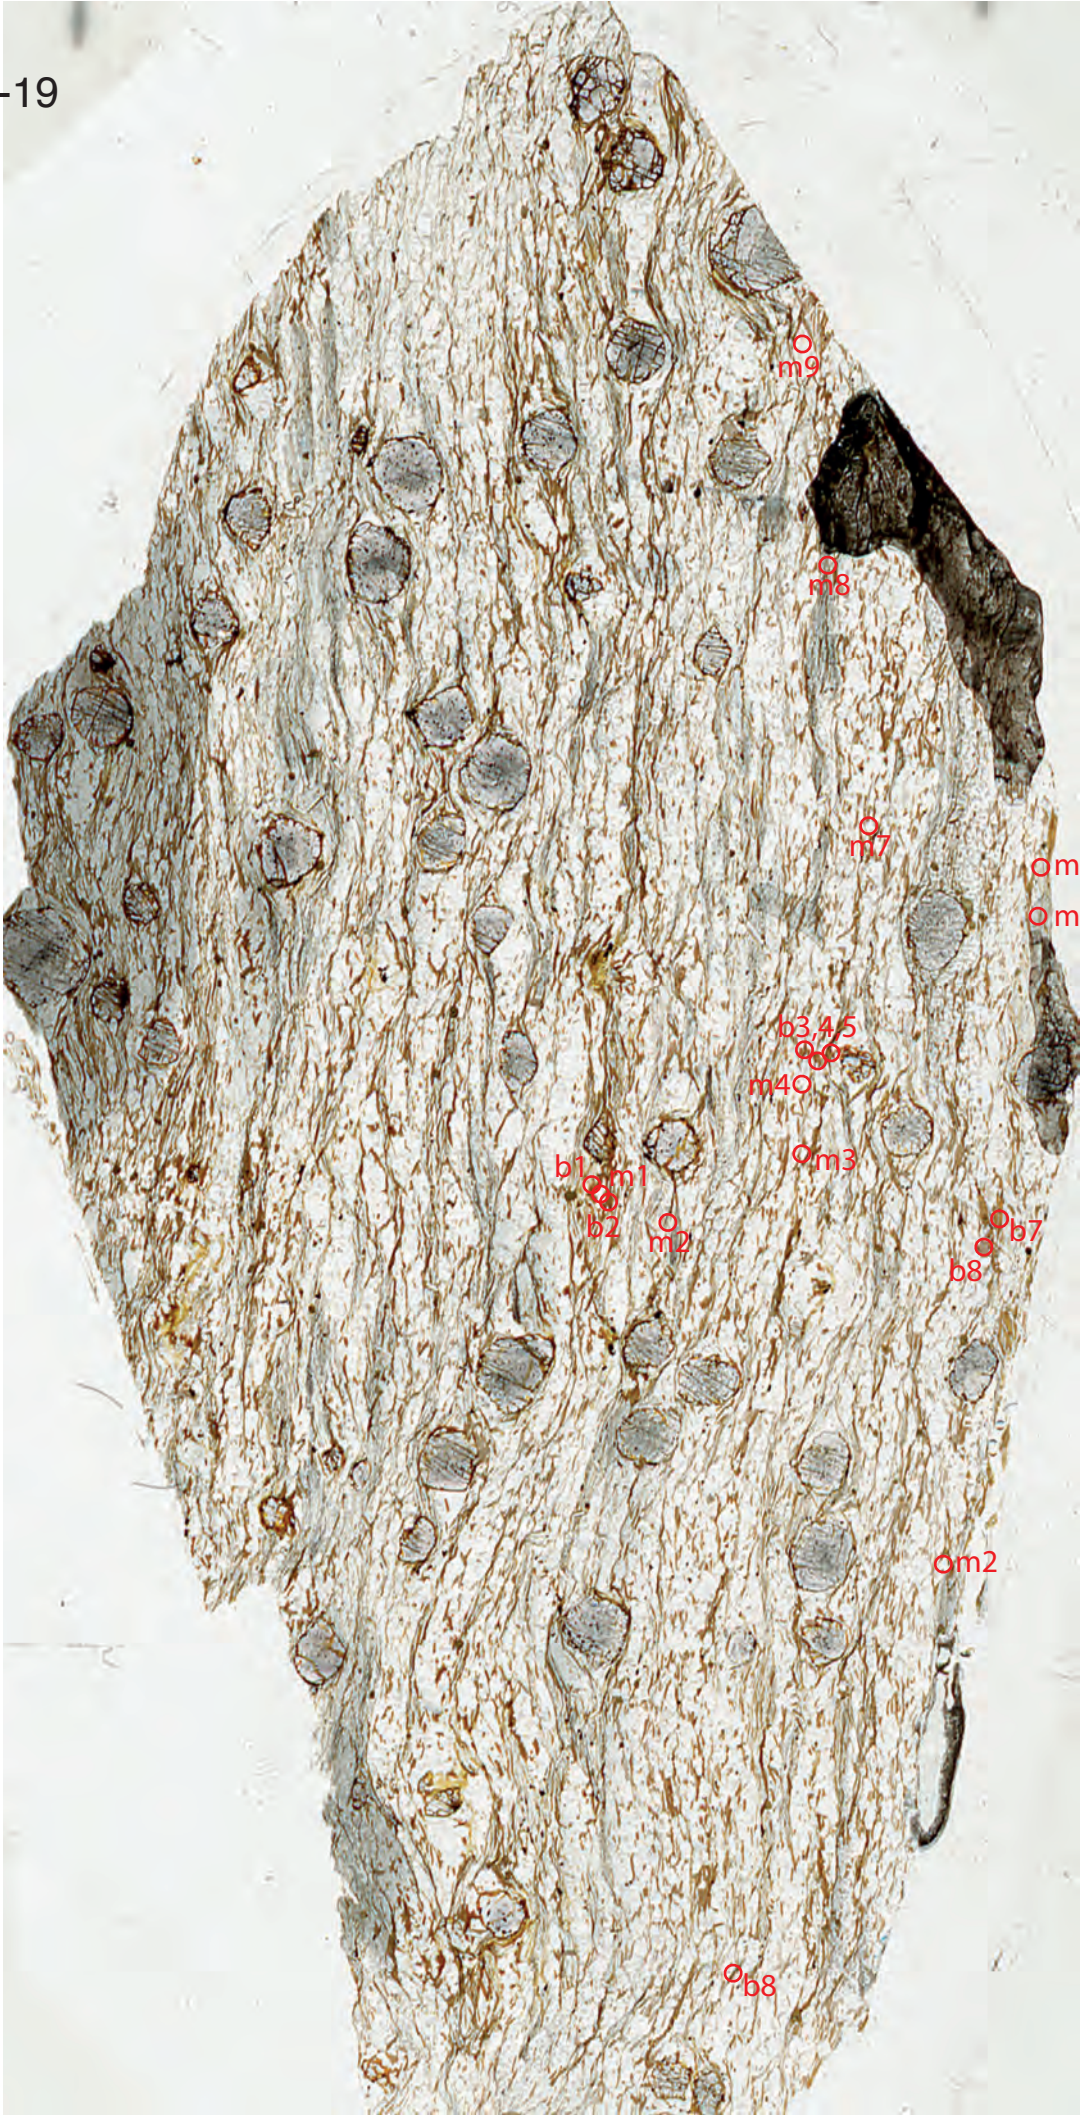



SK-10-20

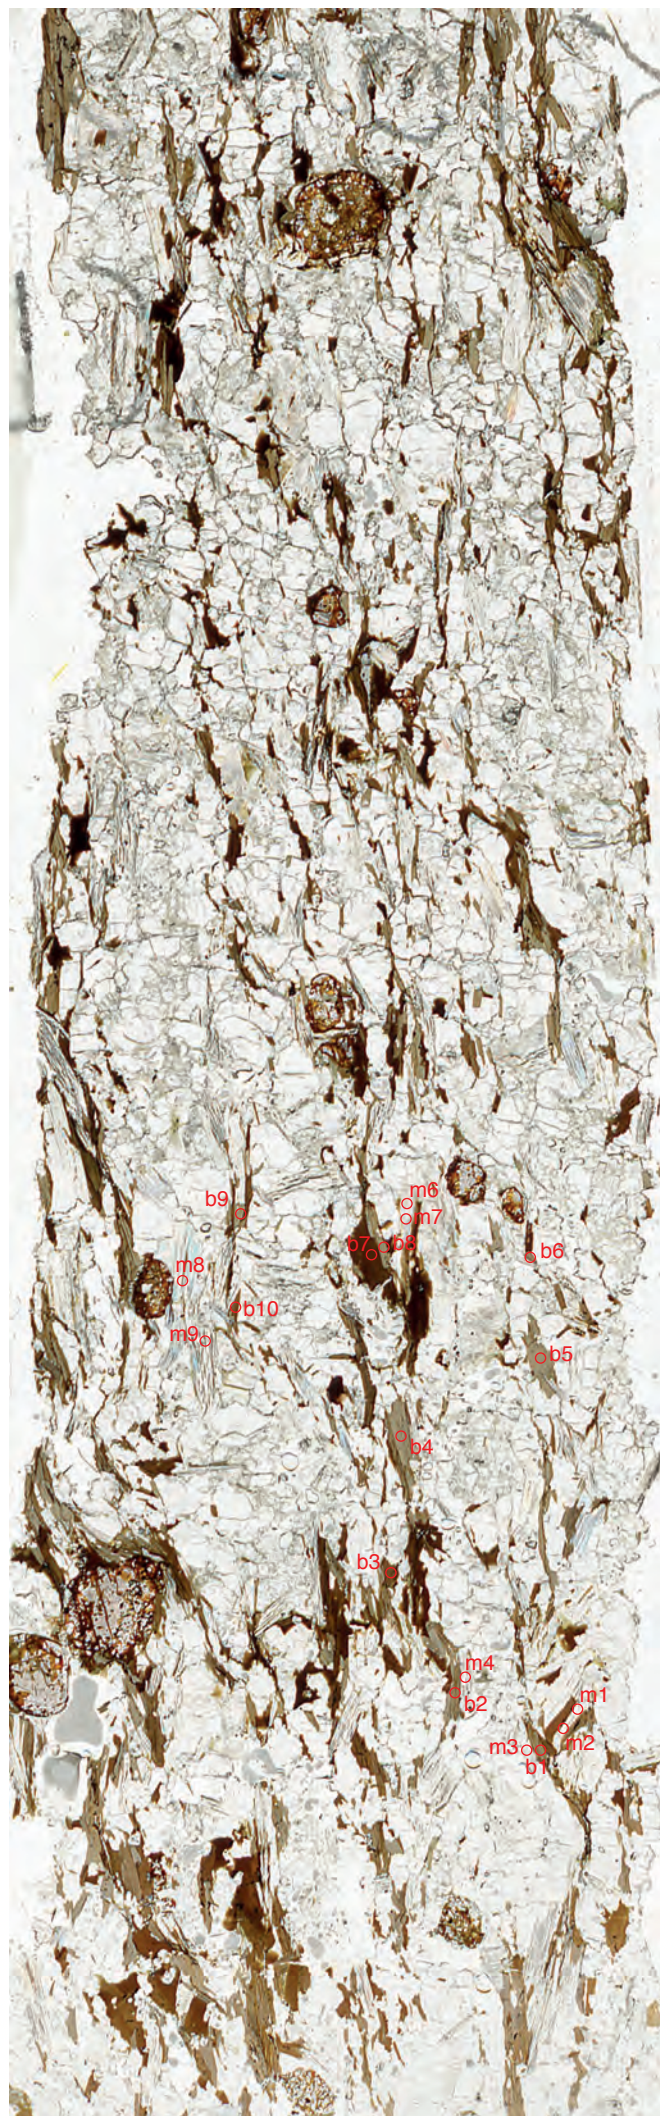



SK-10-21

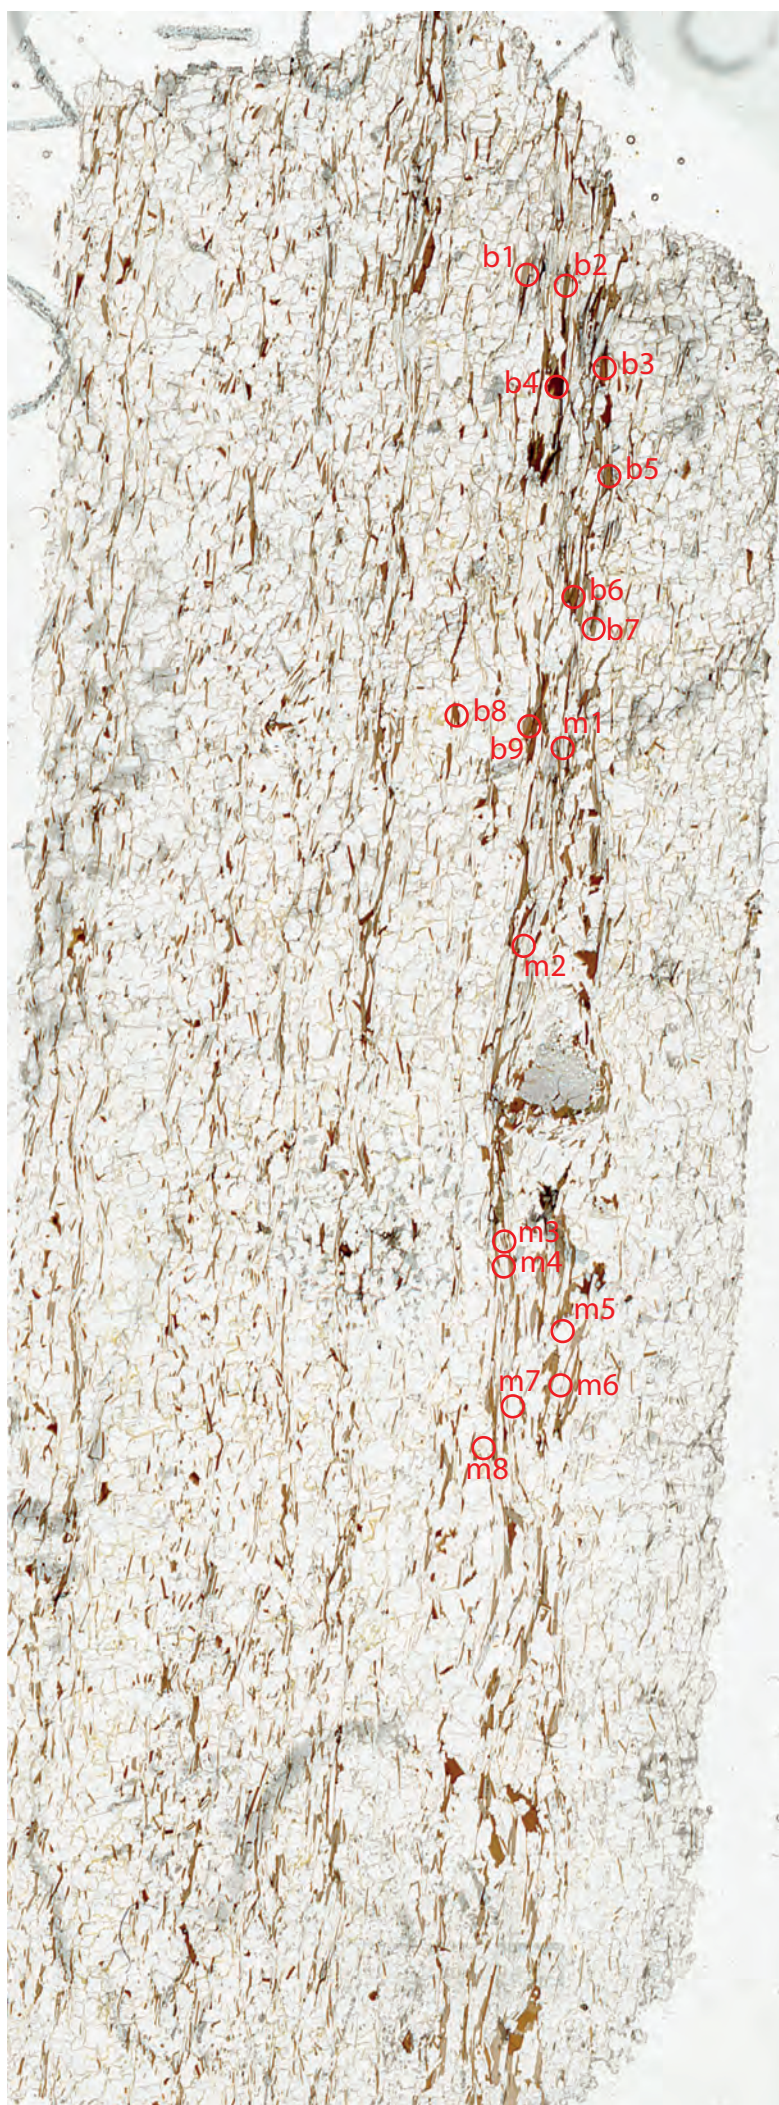



SK-10-22

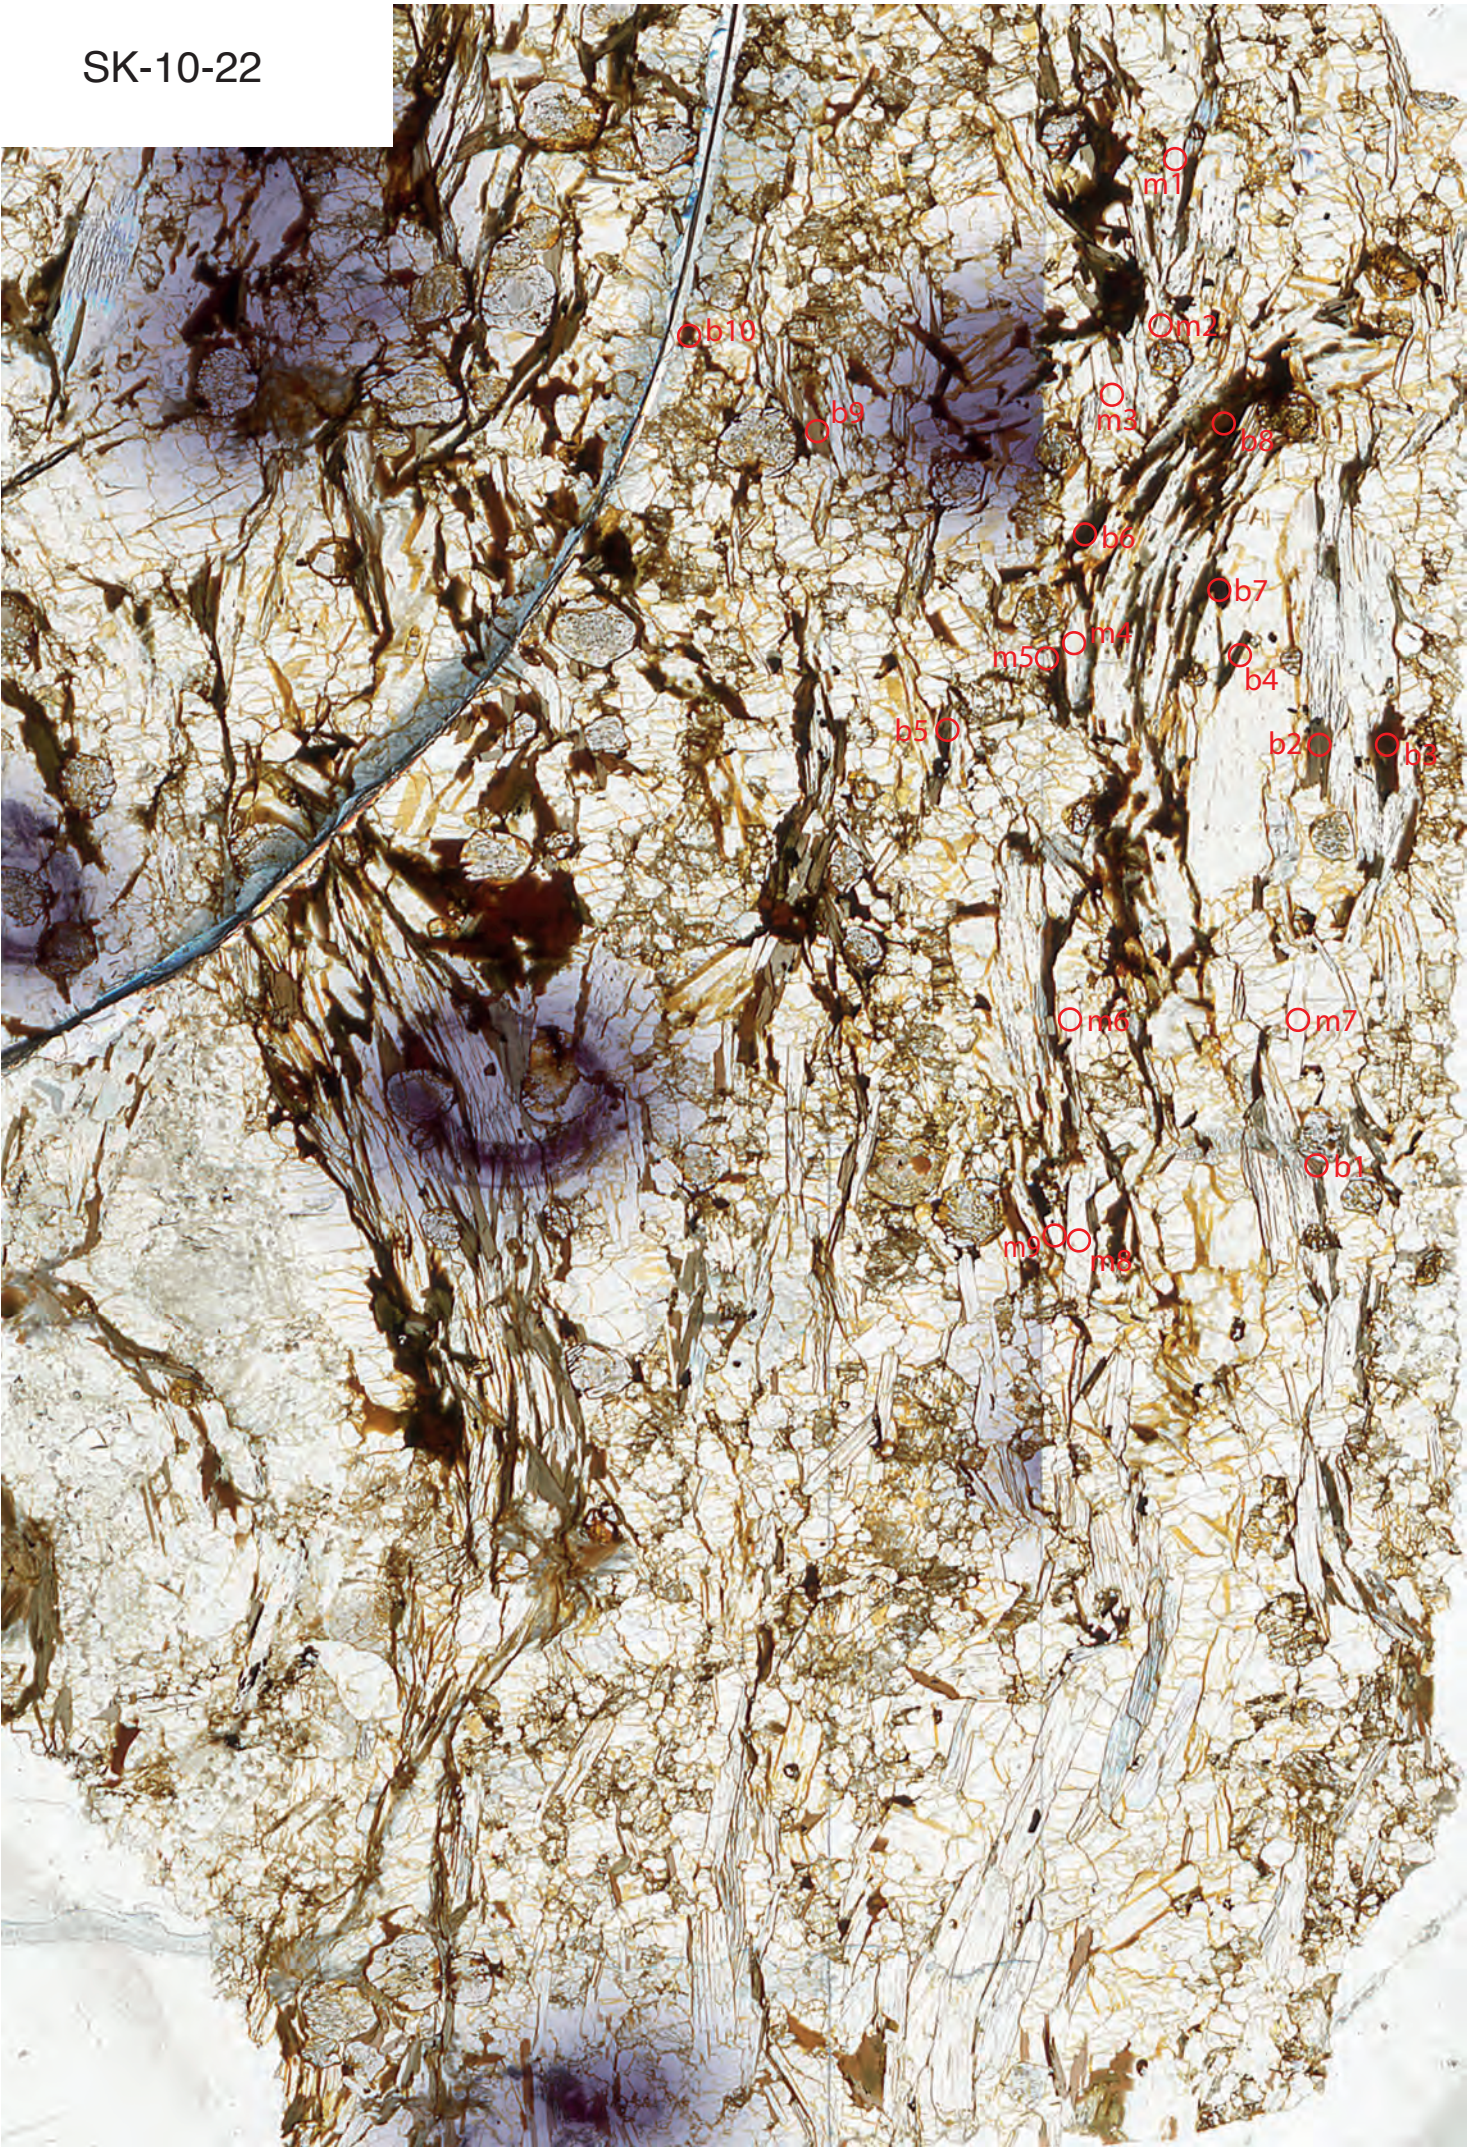



N13

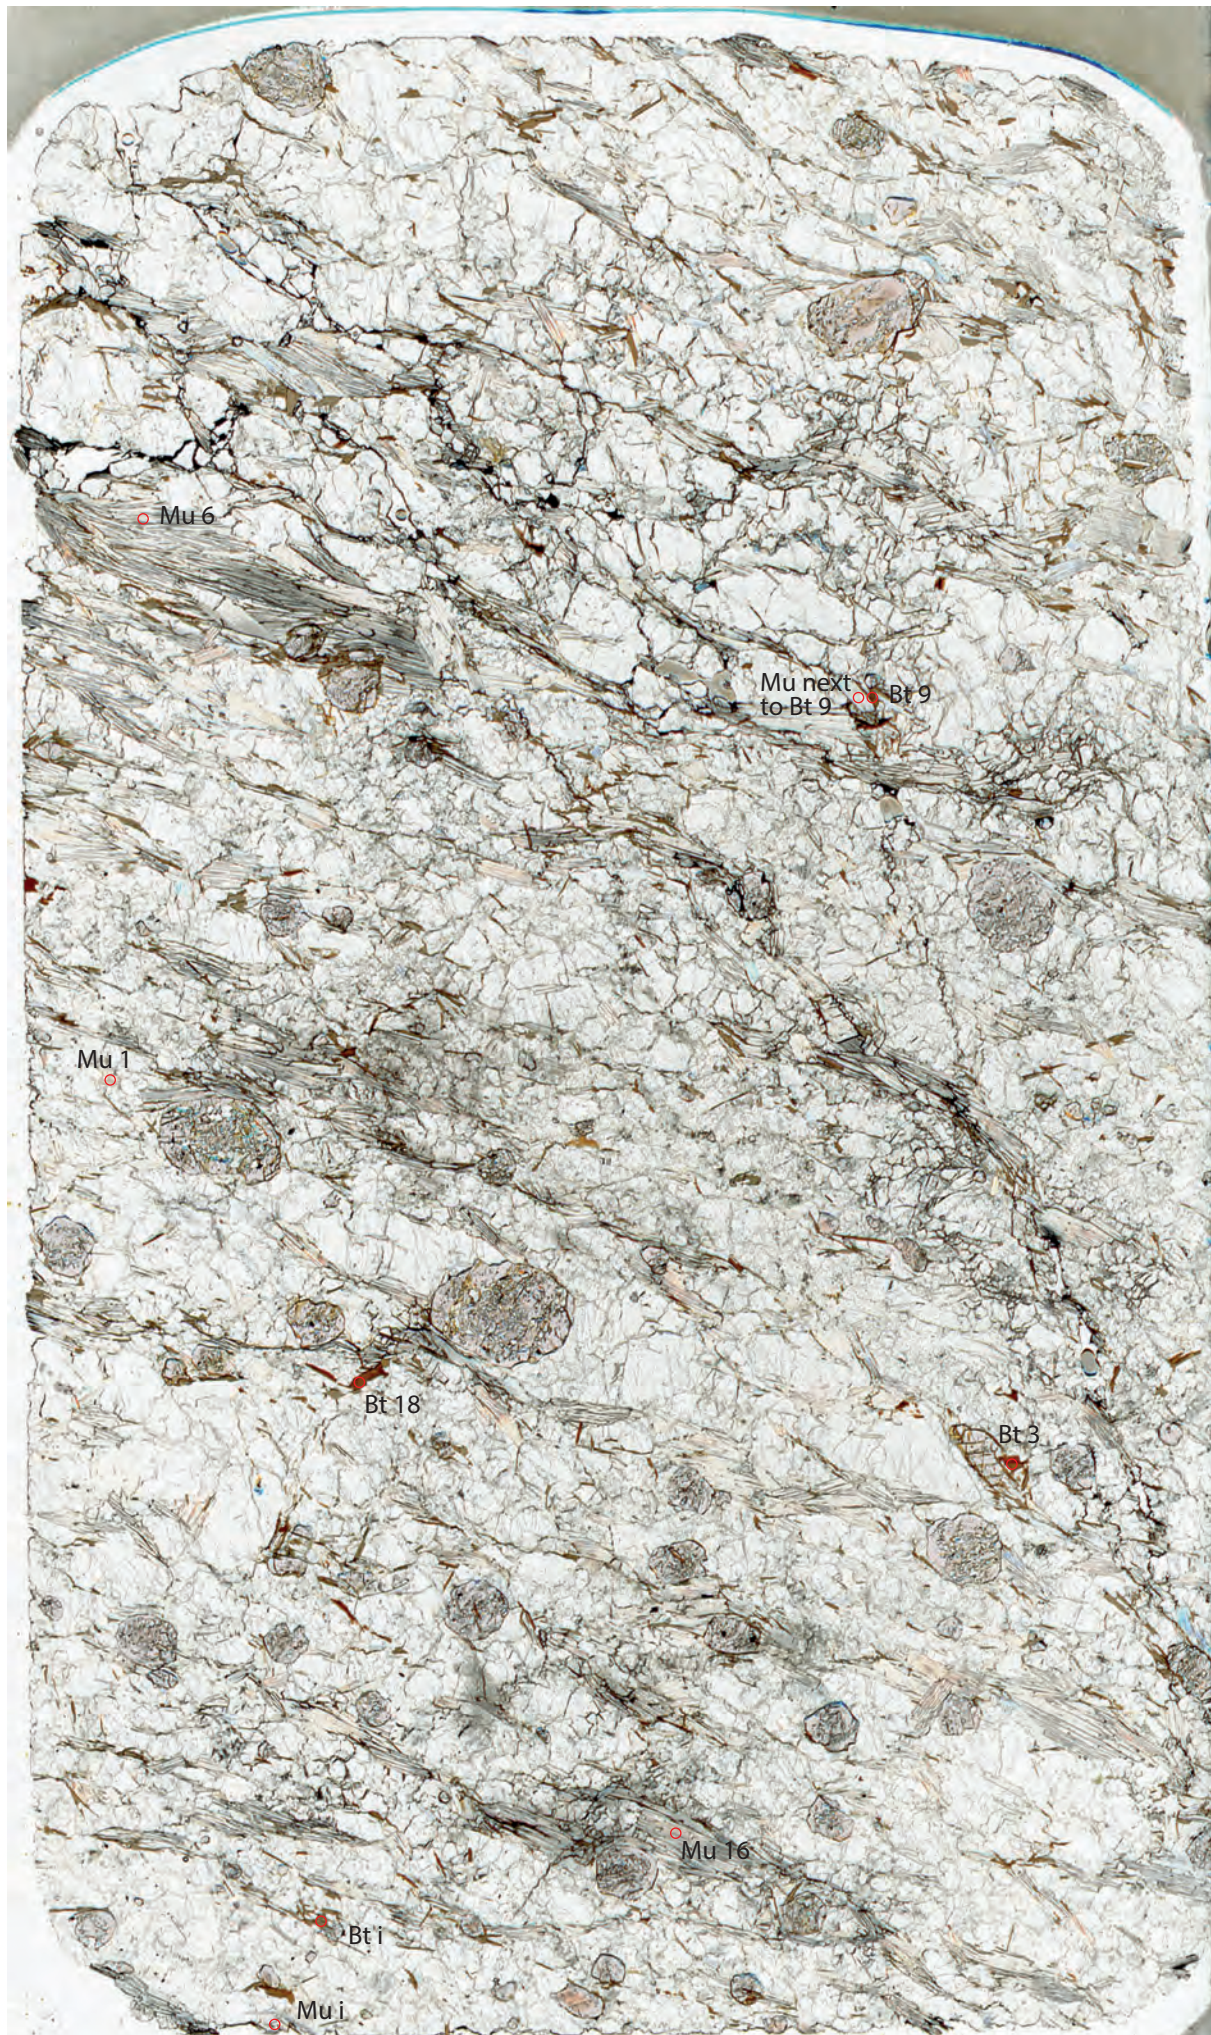



N2

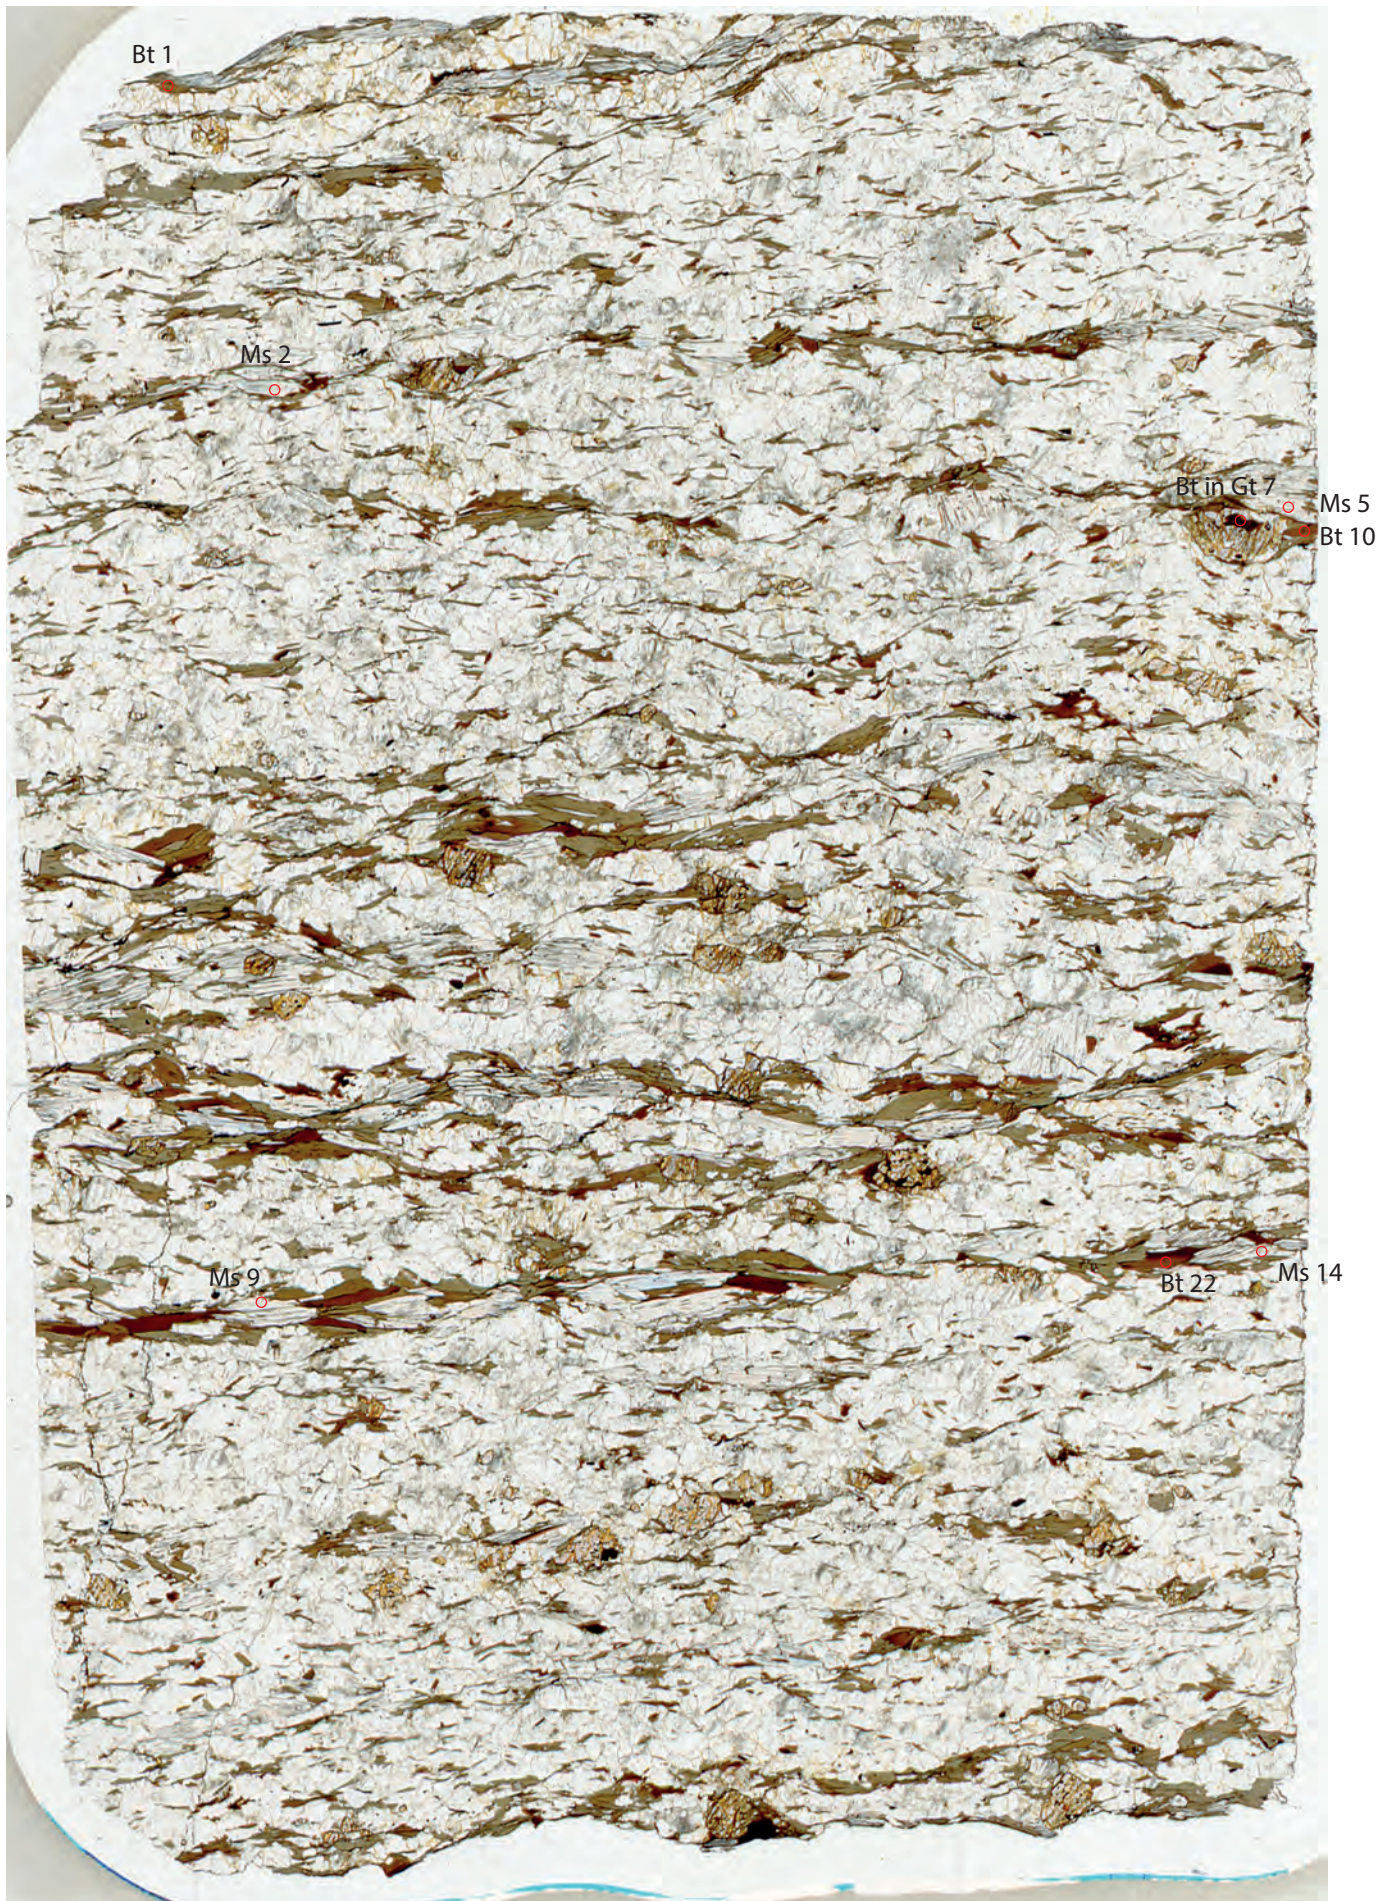



N5

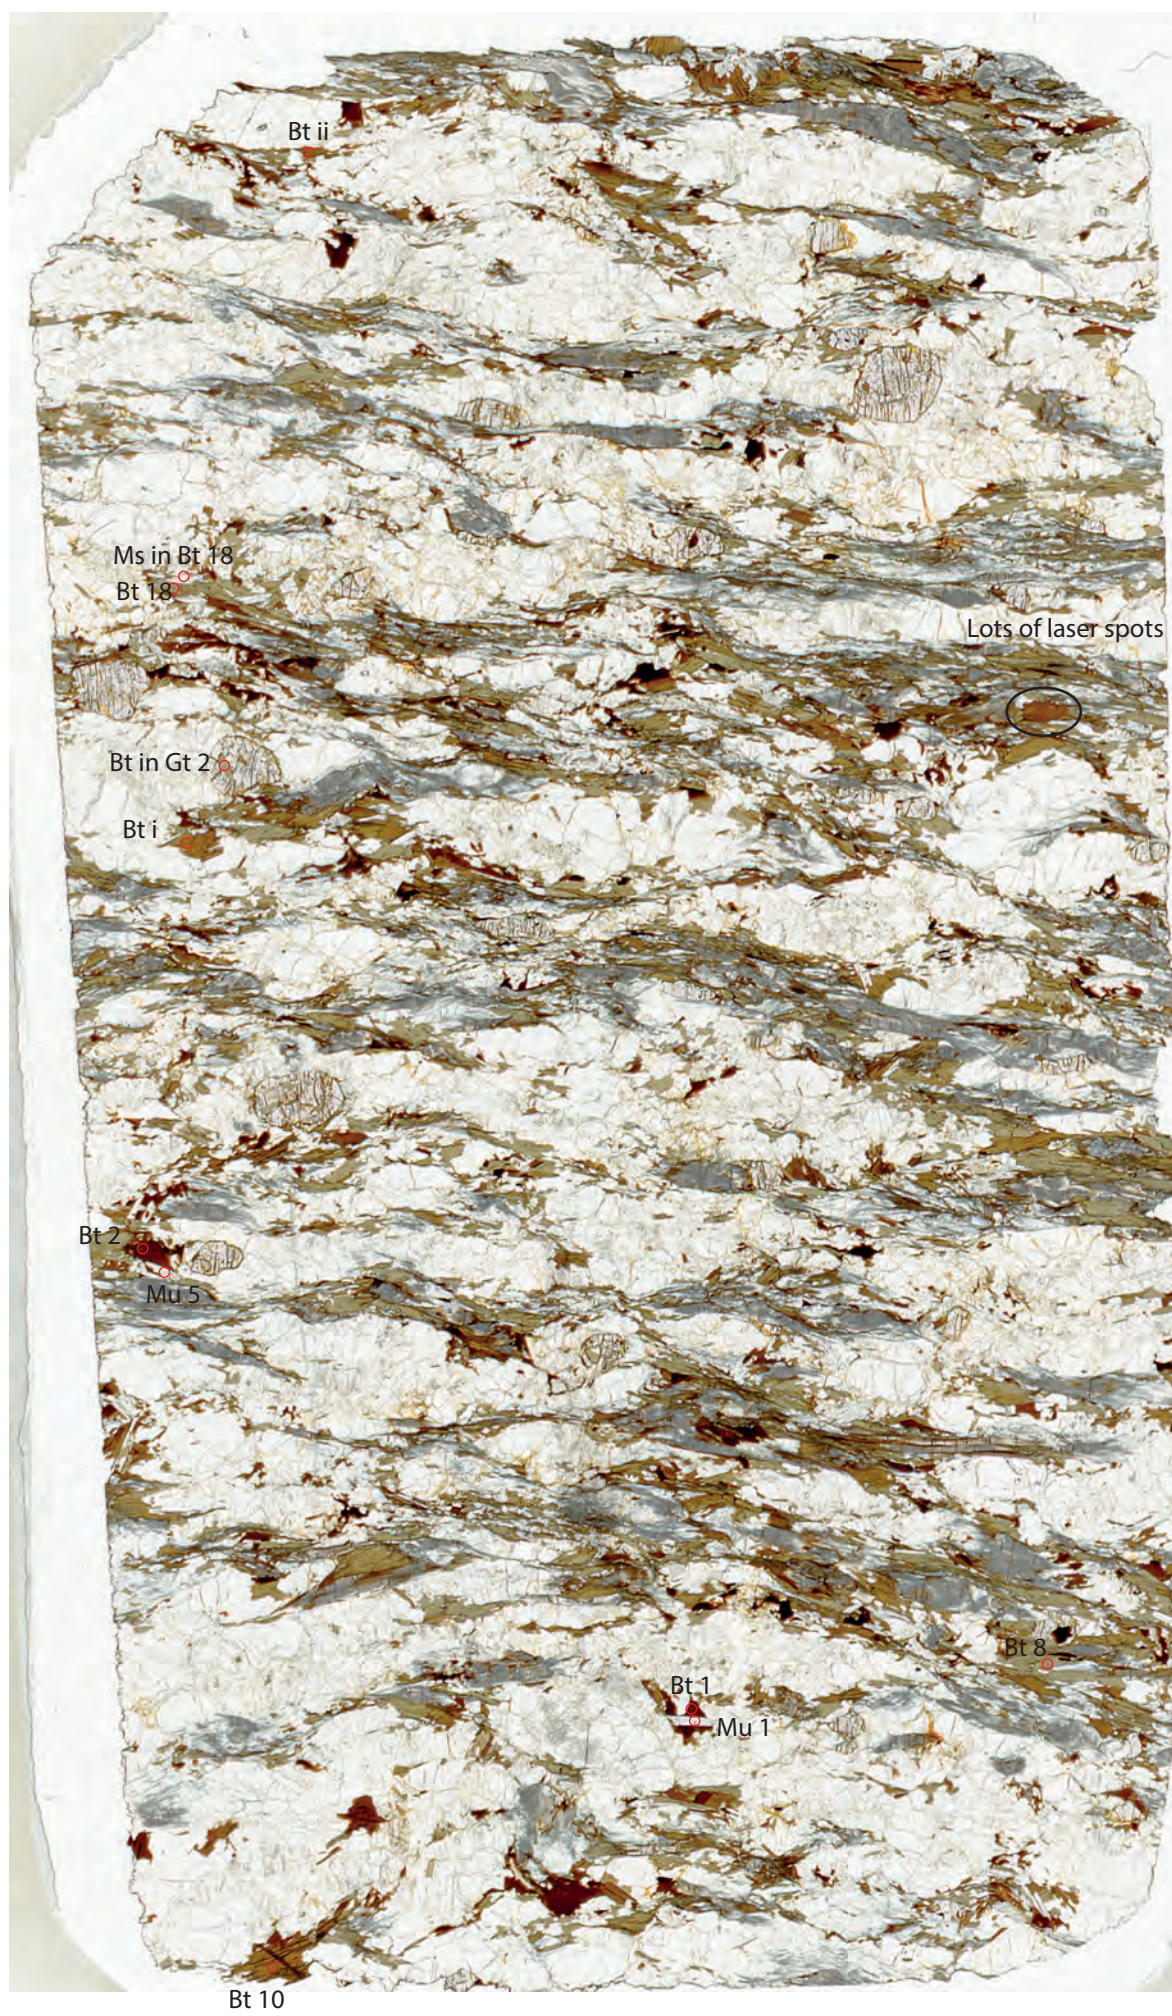



N11

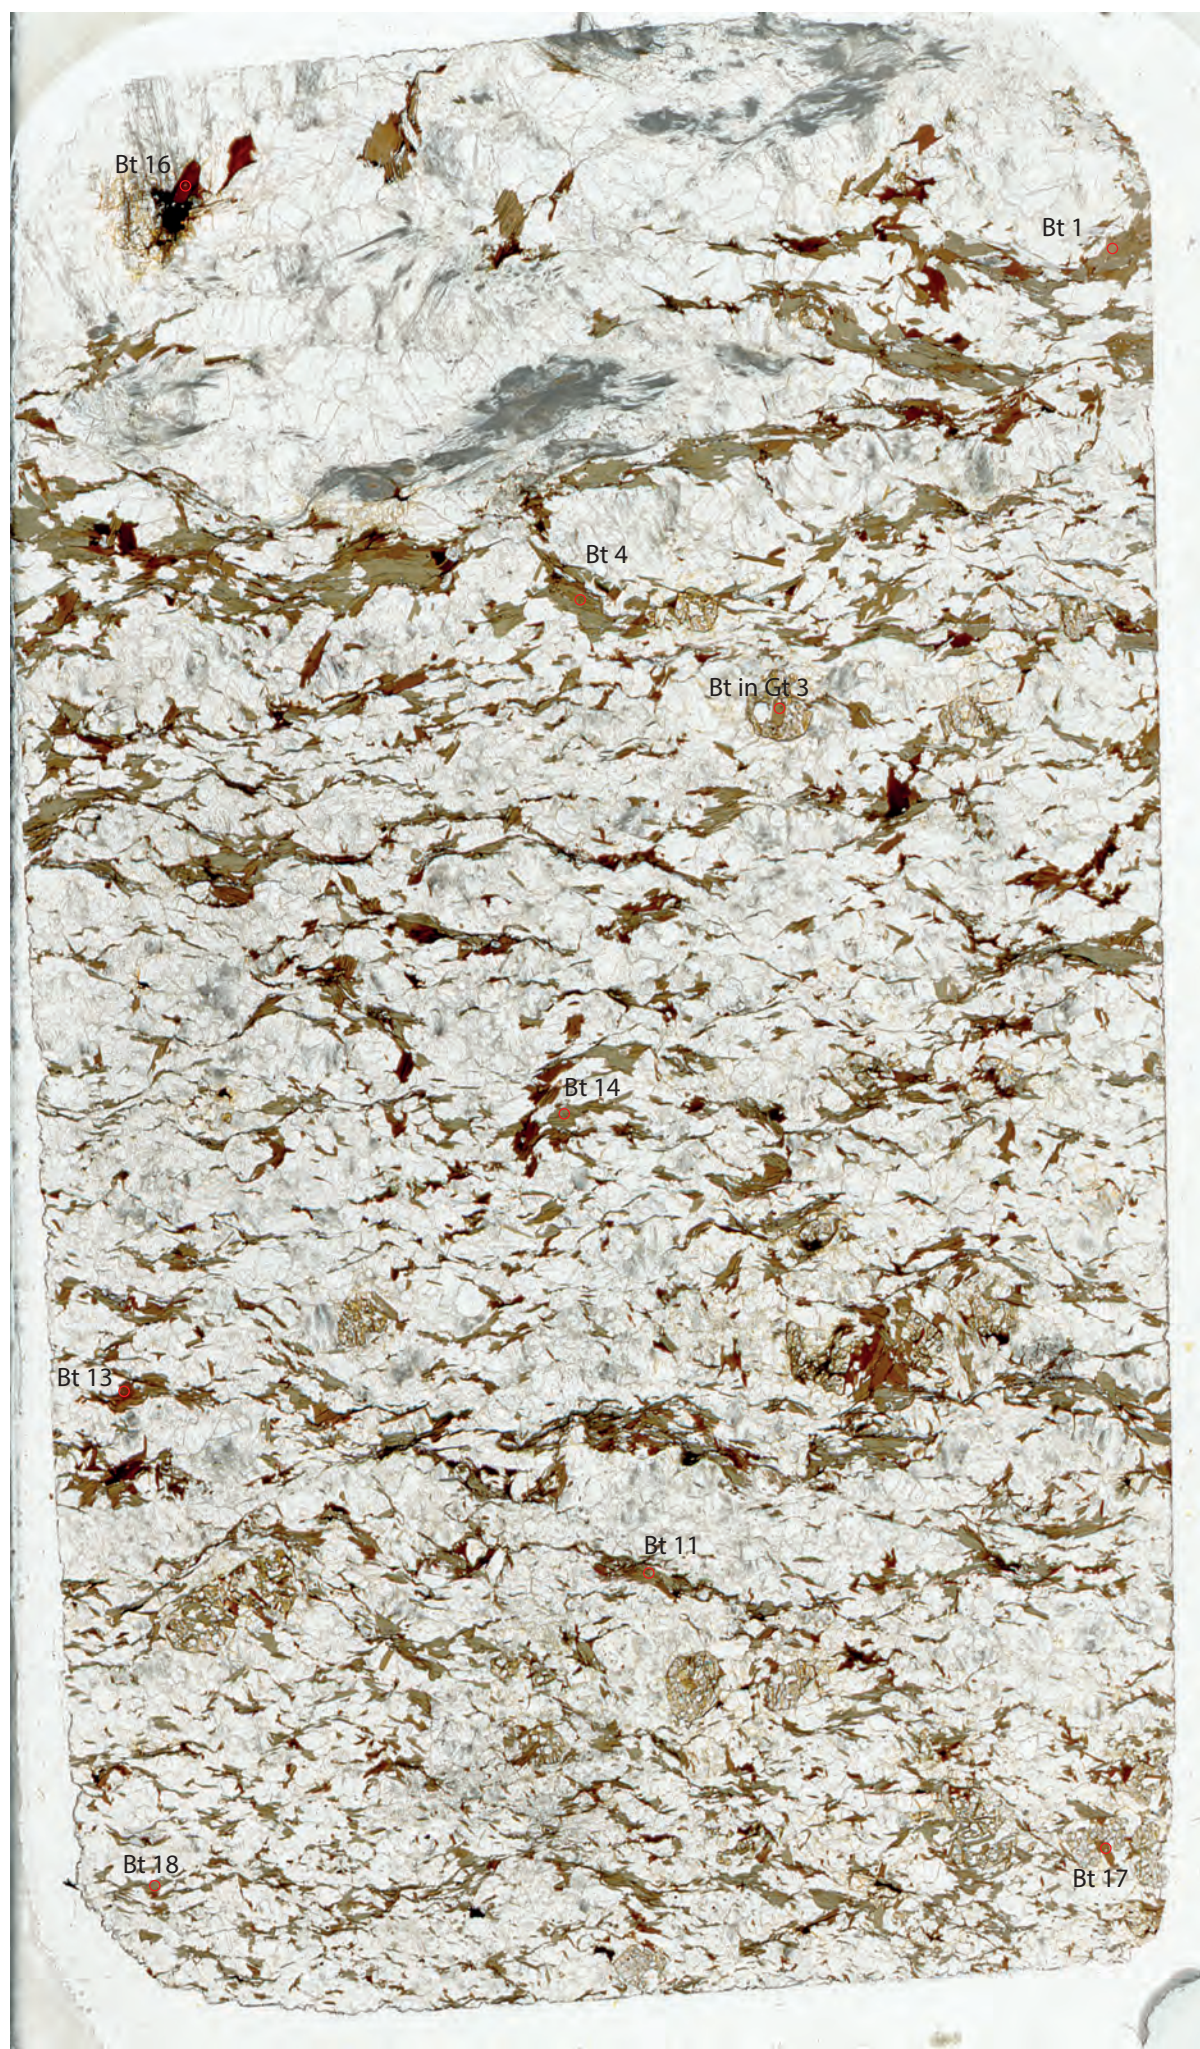



IZ410

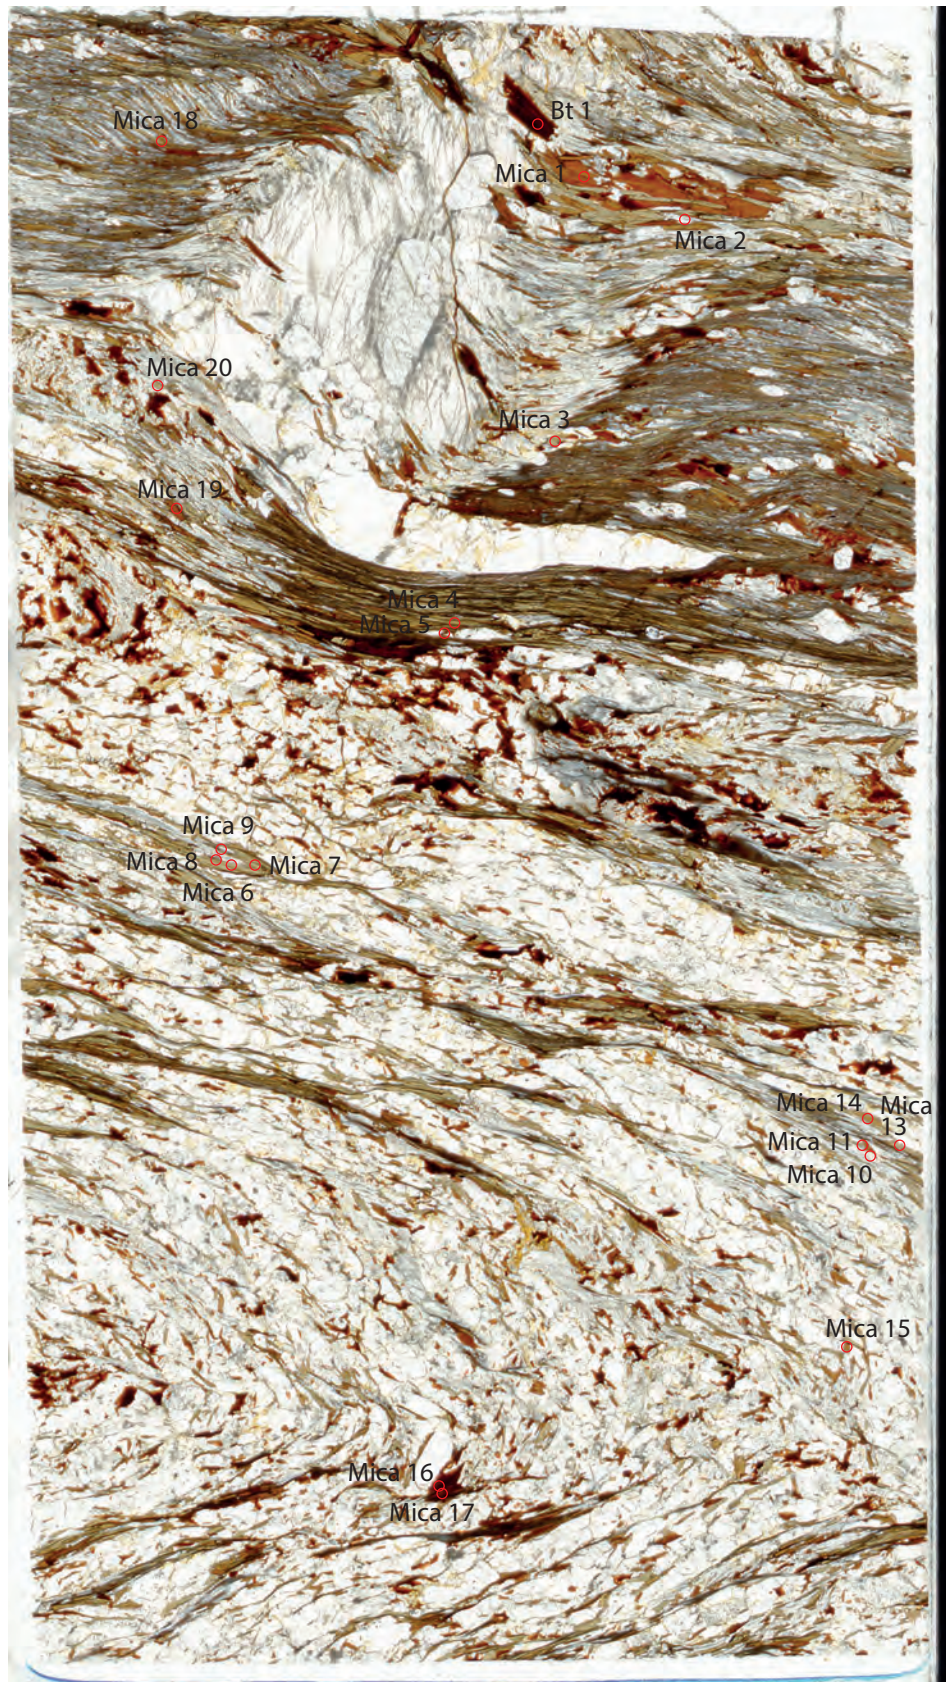



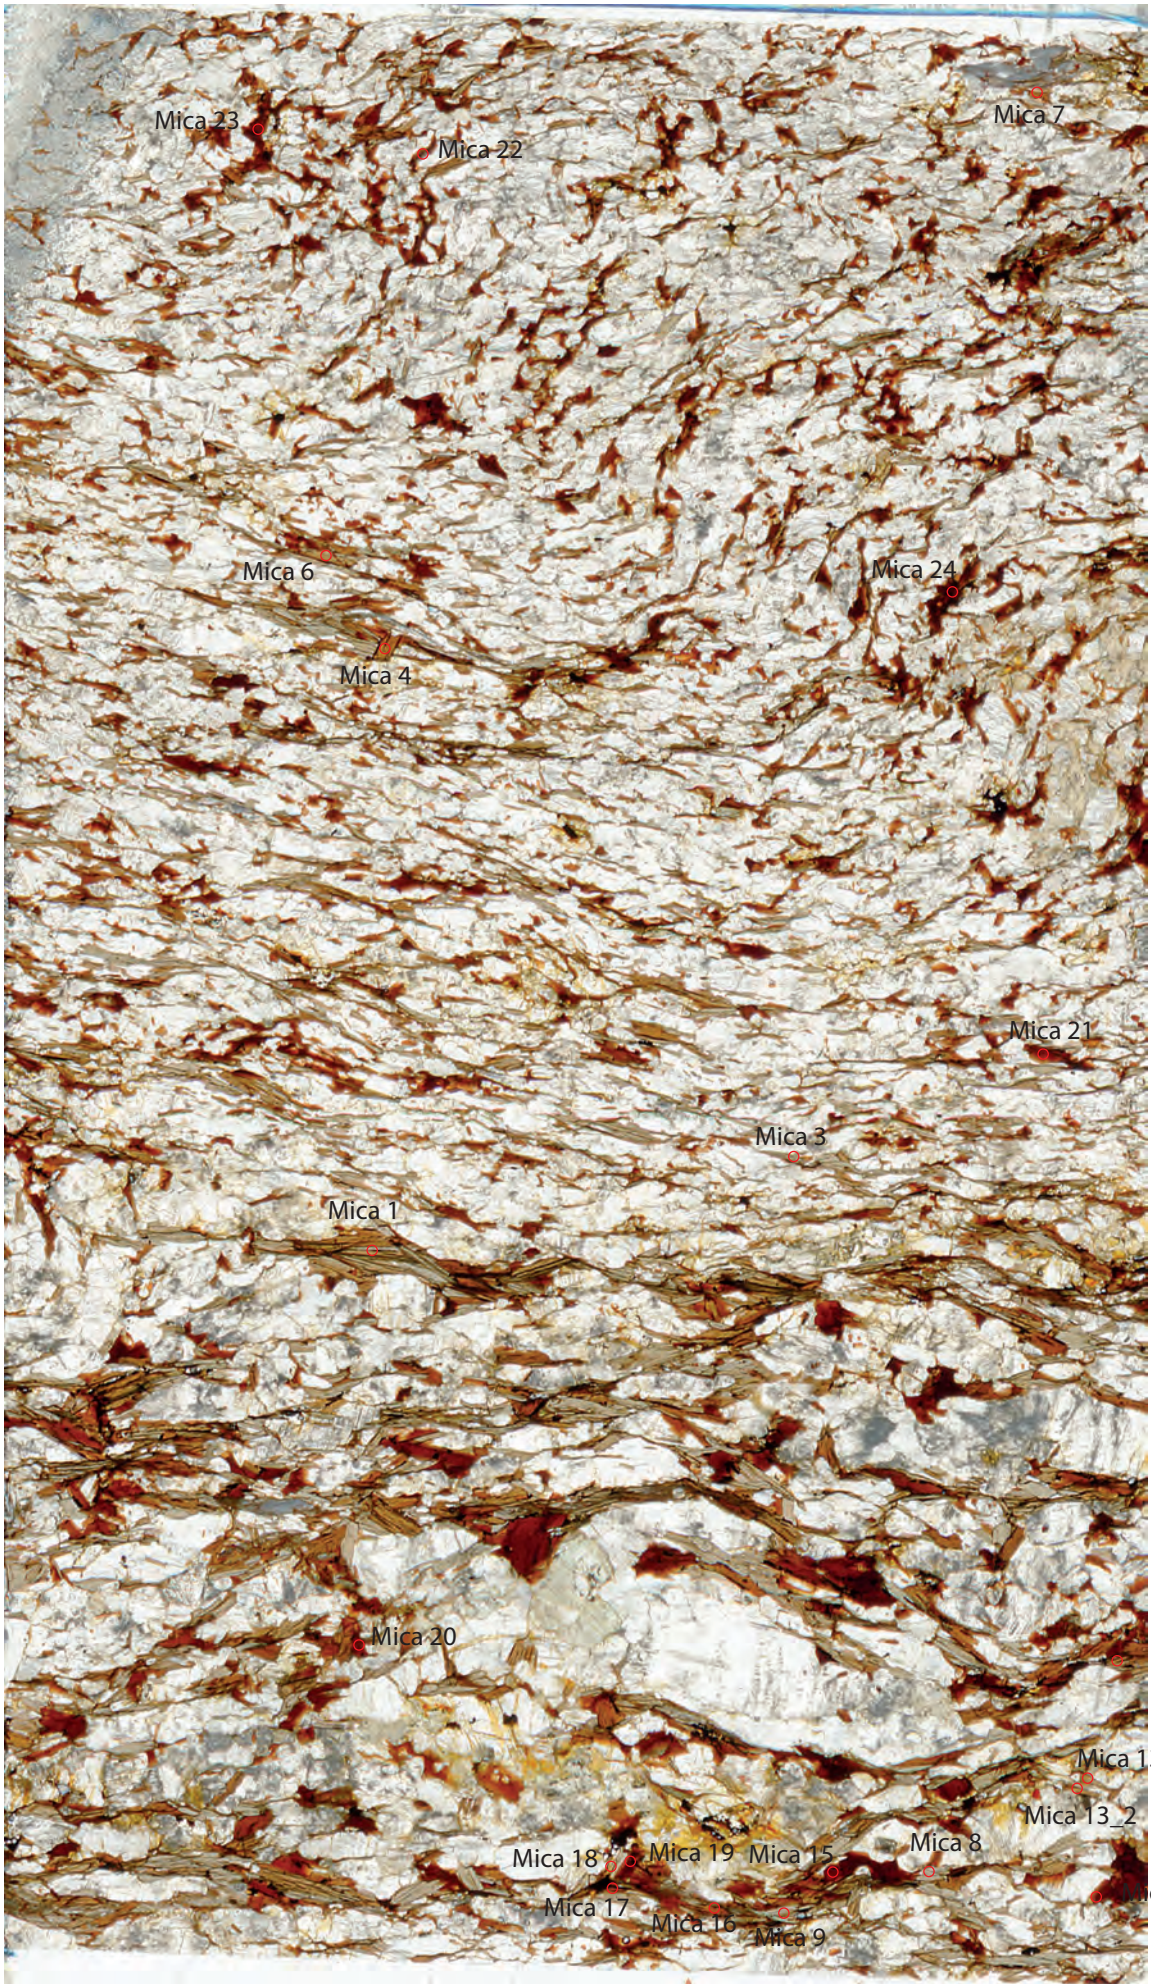



12 419

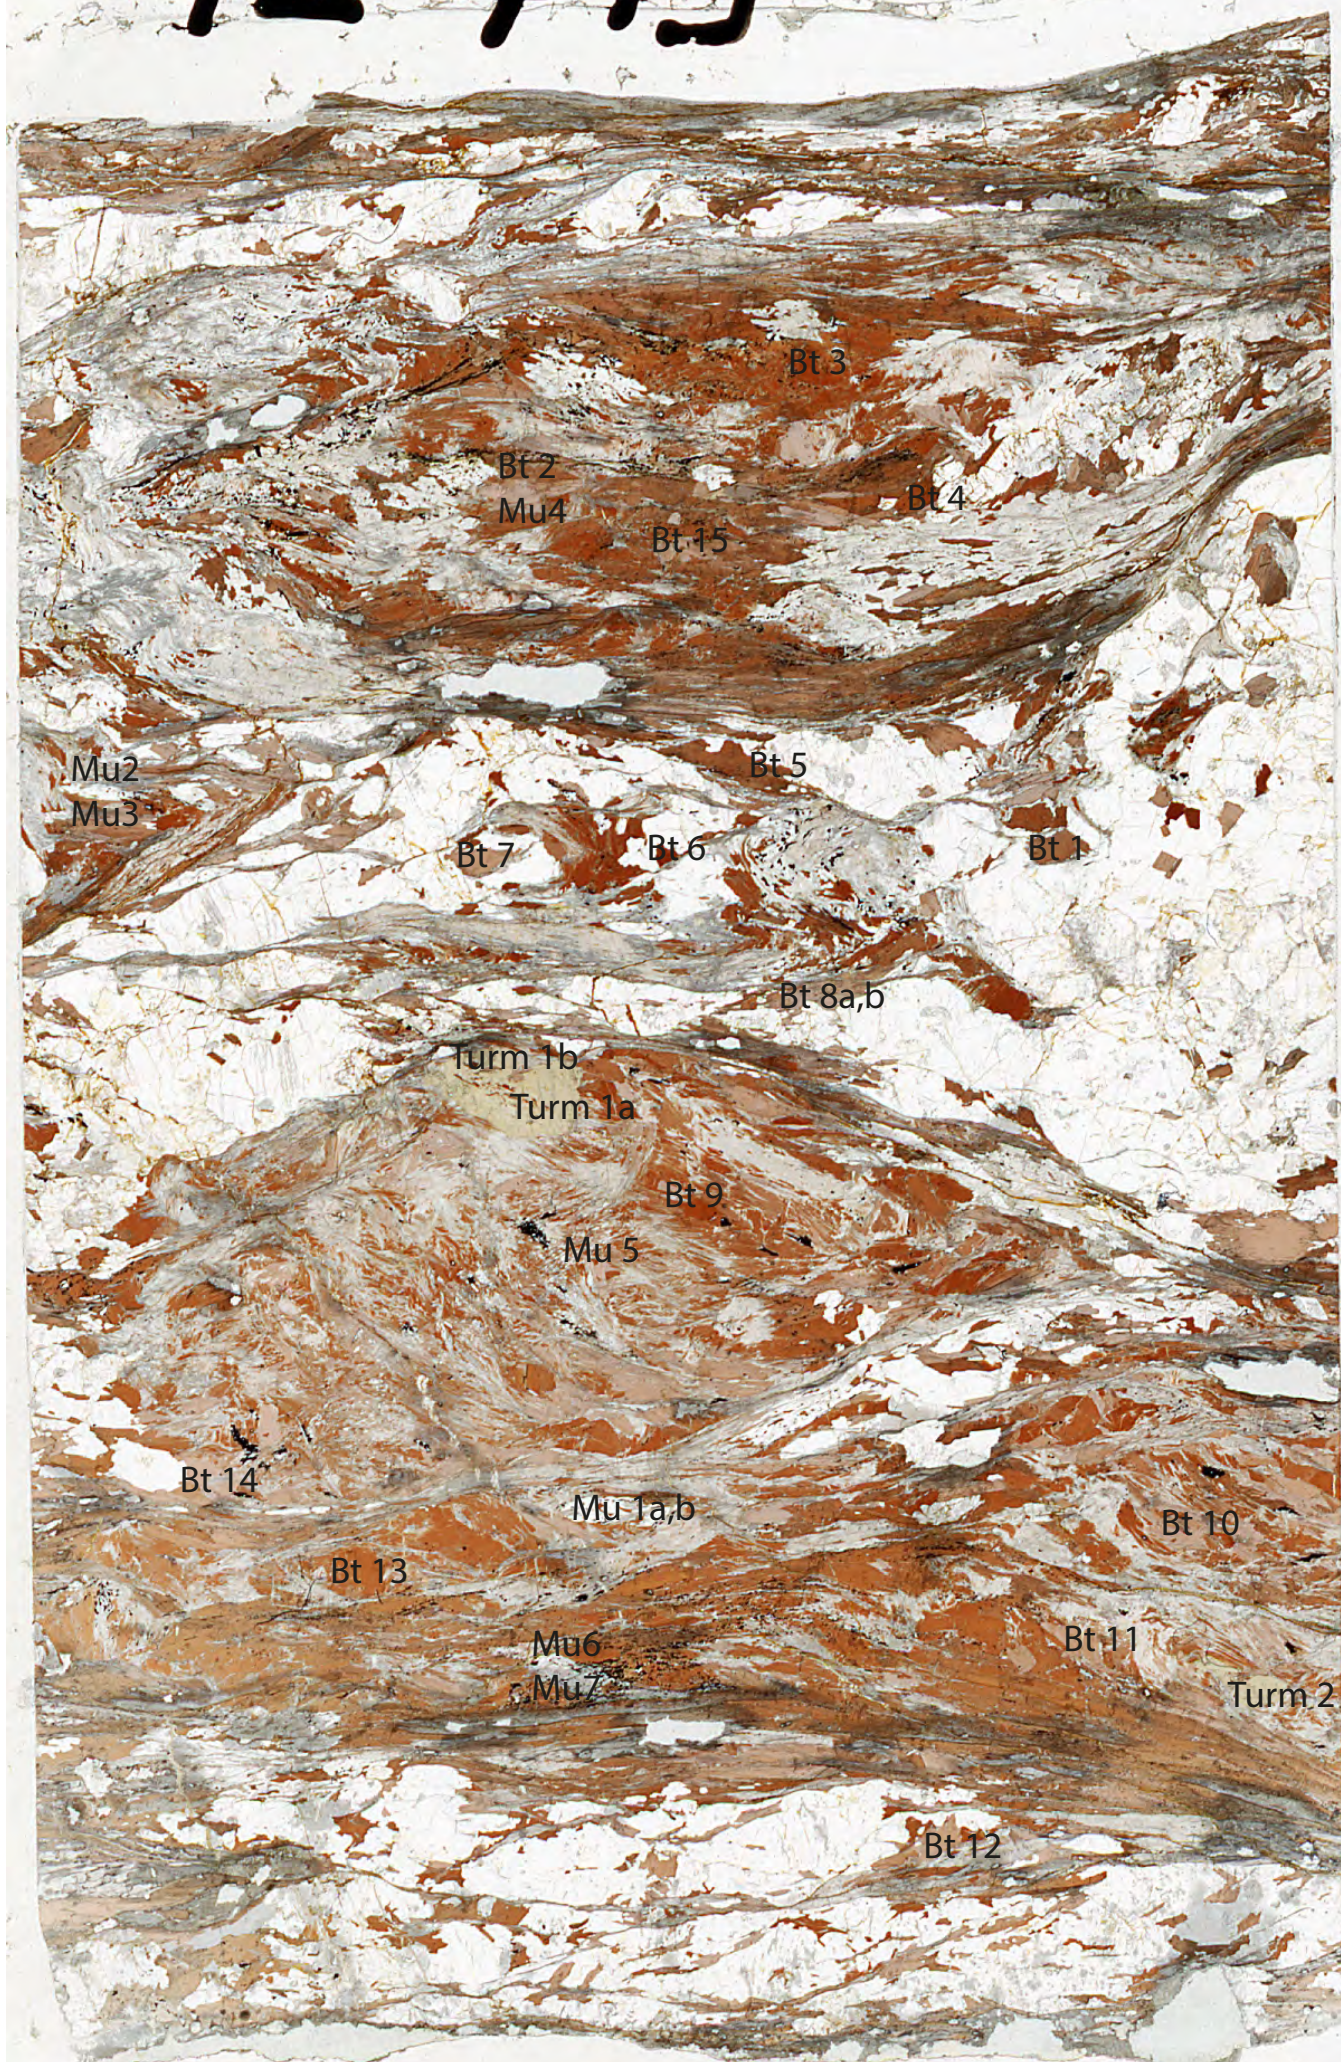



IZ420

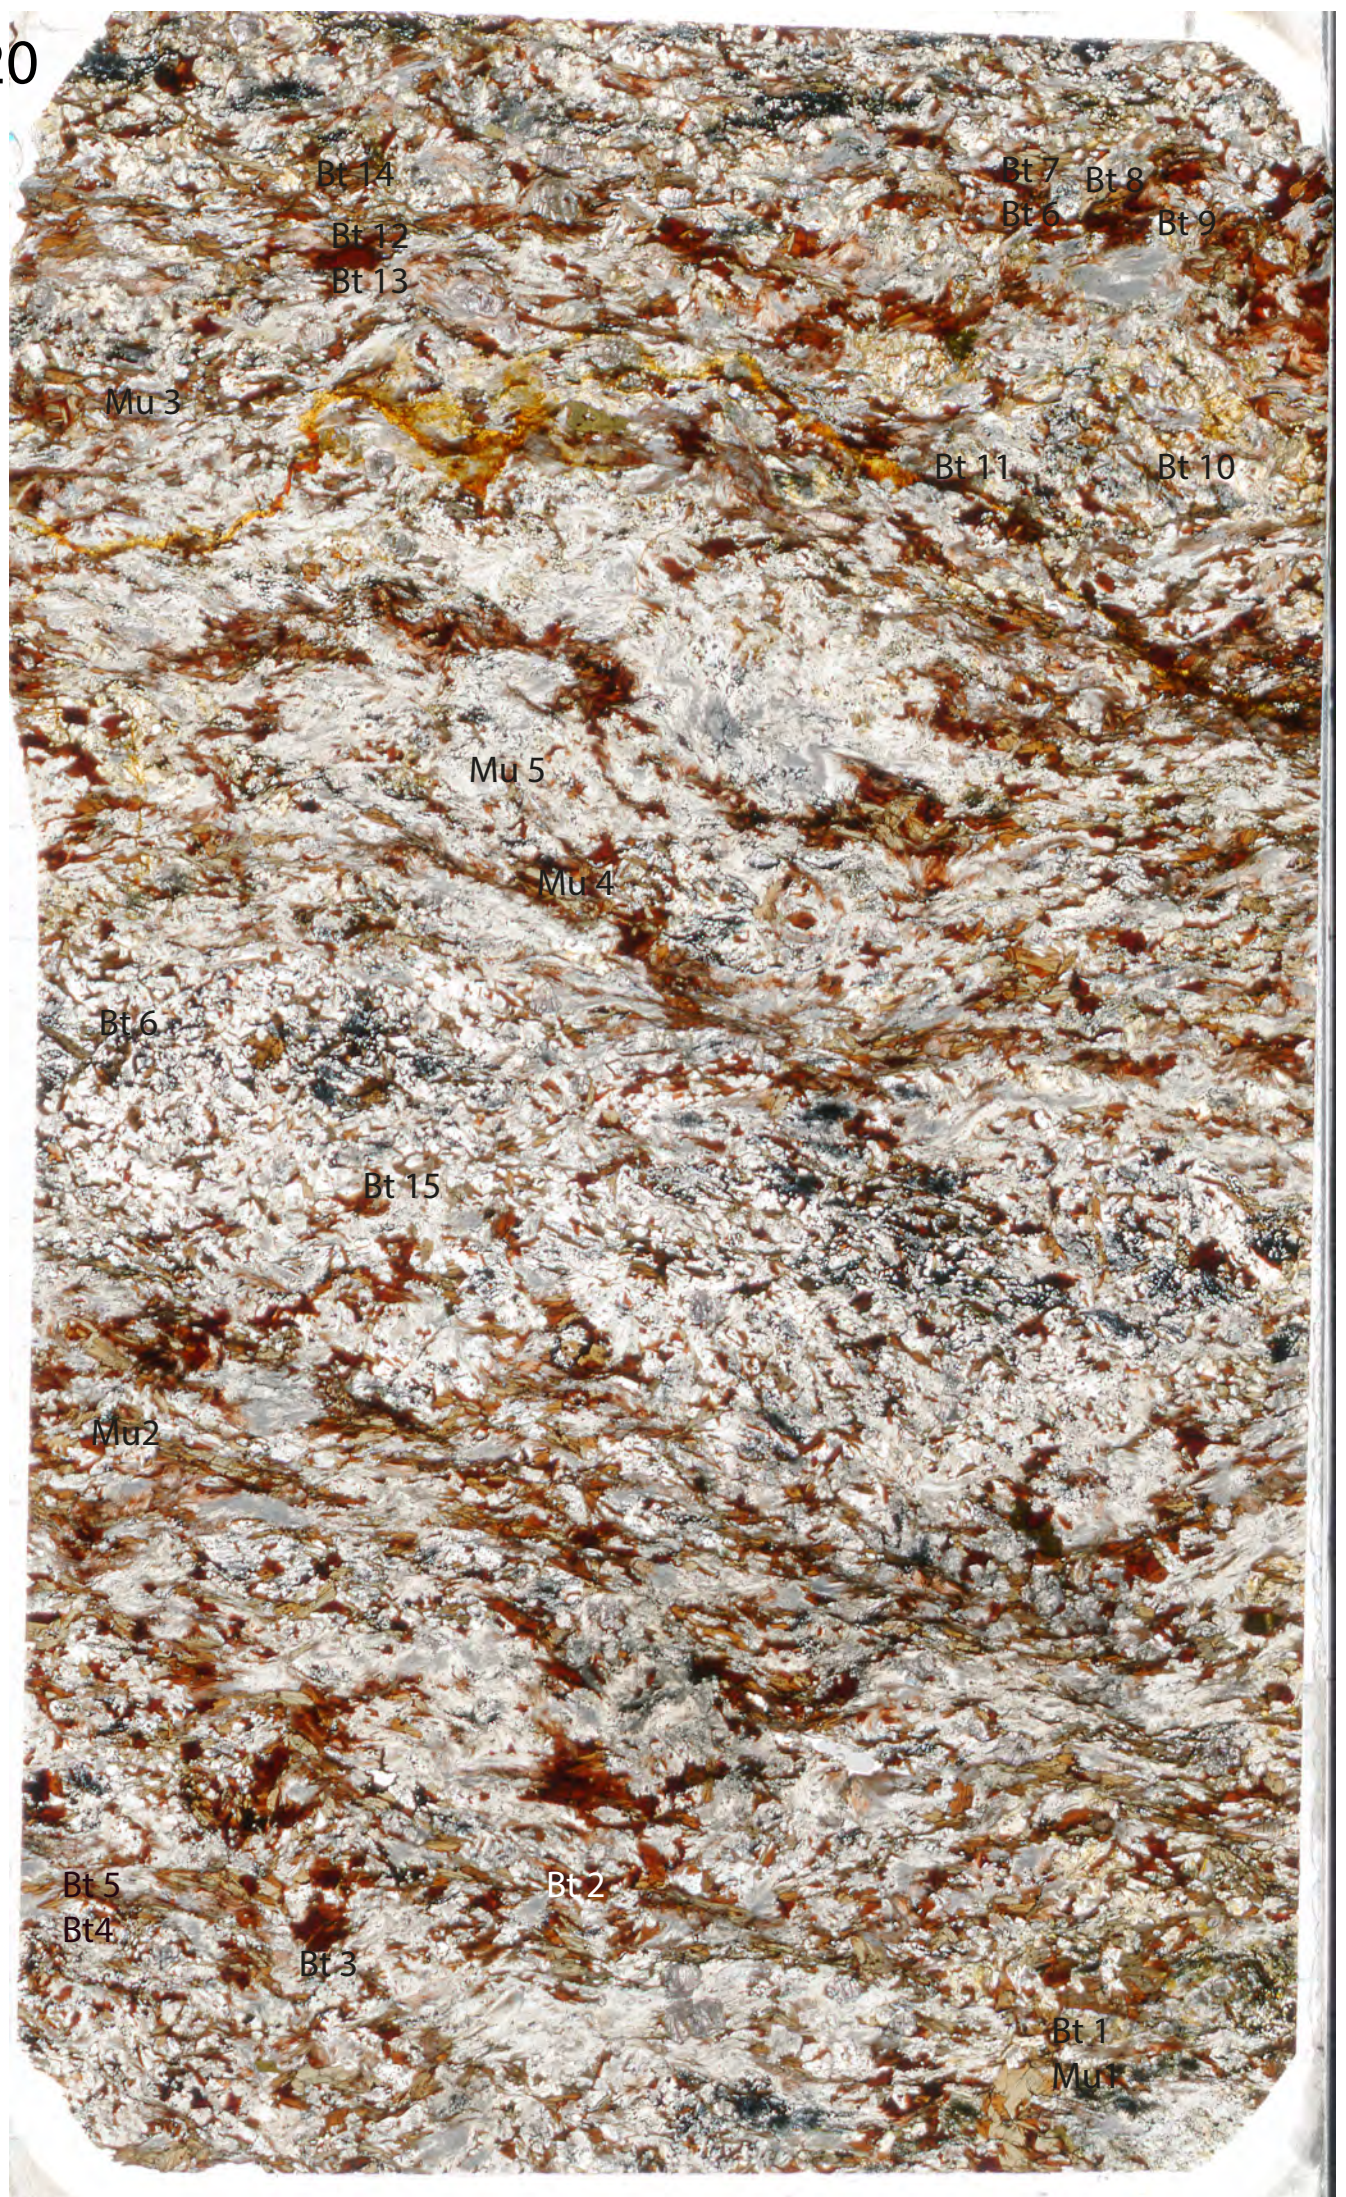



12421

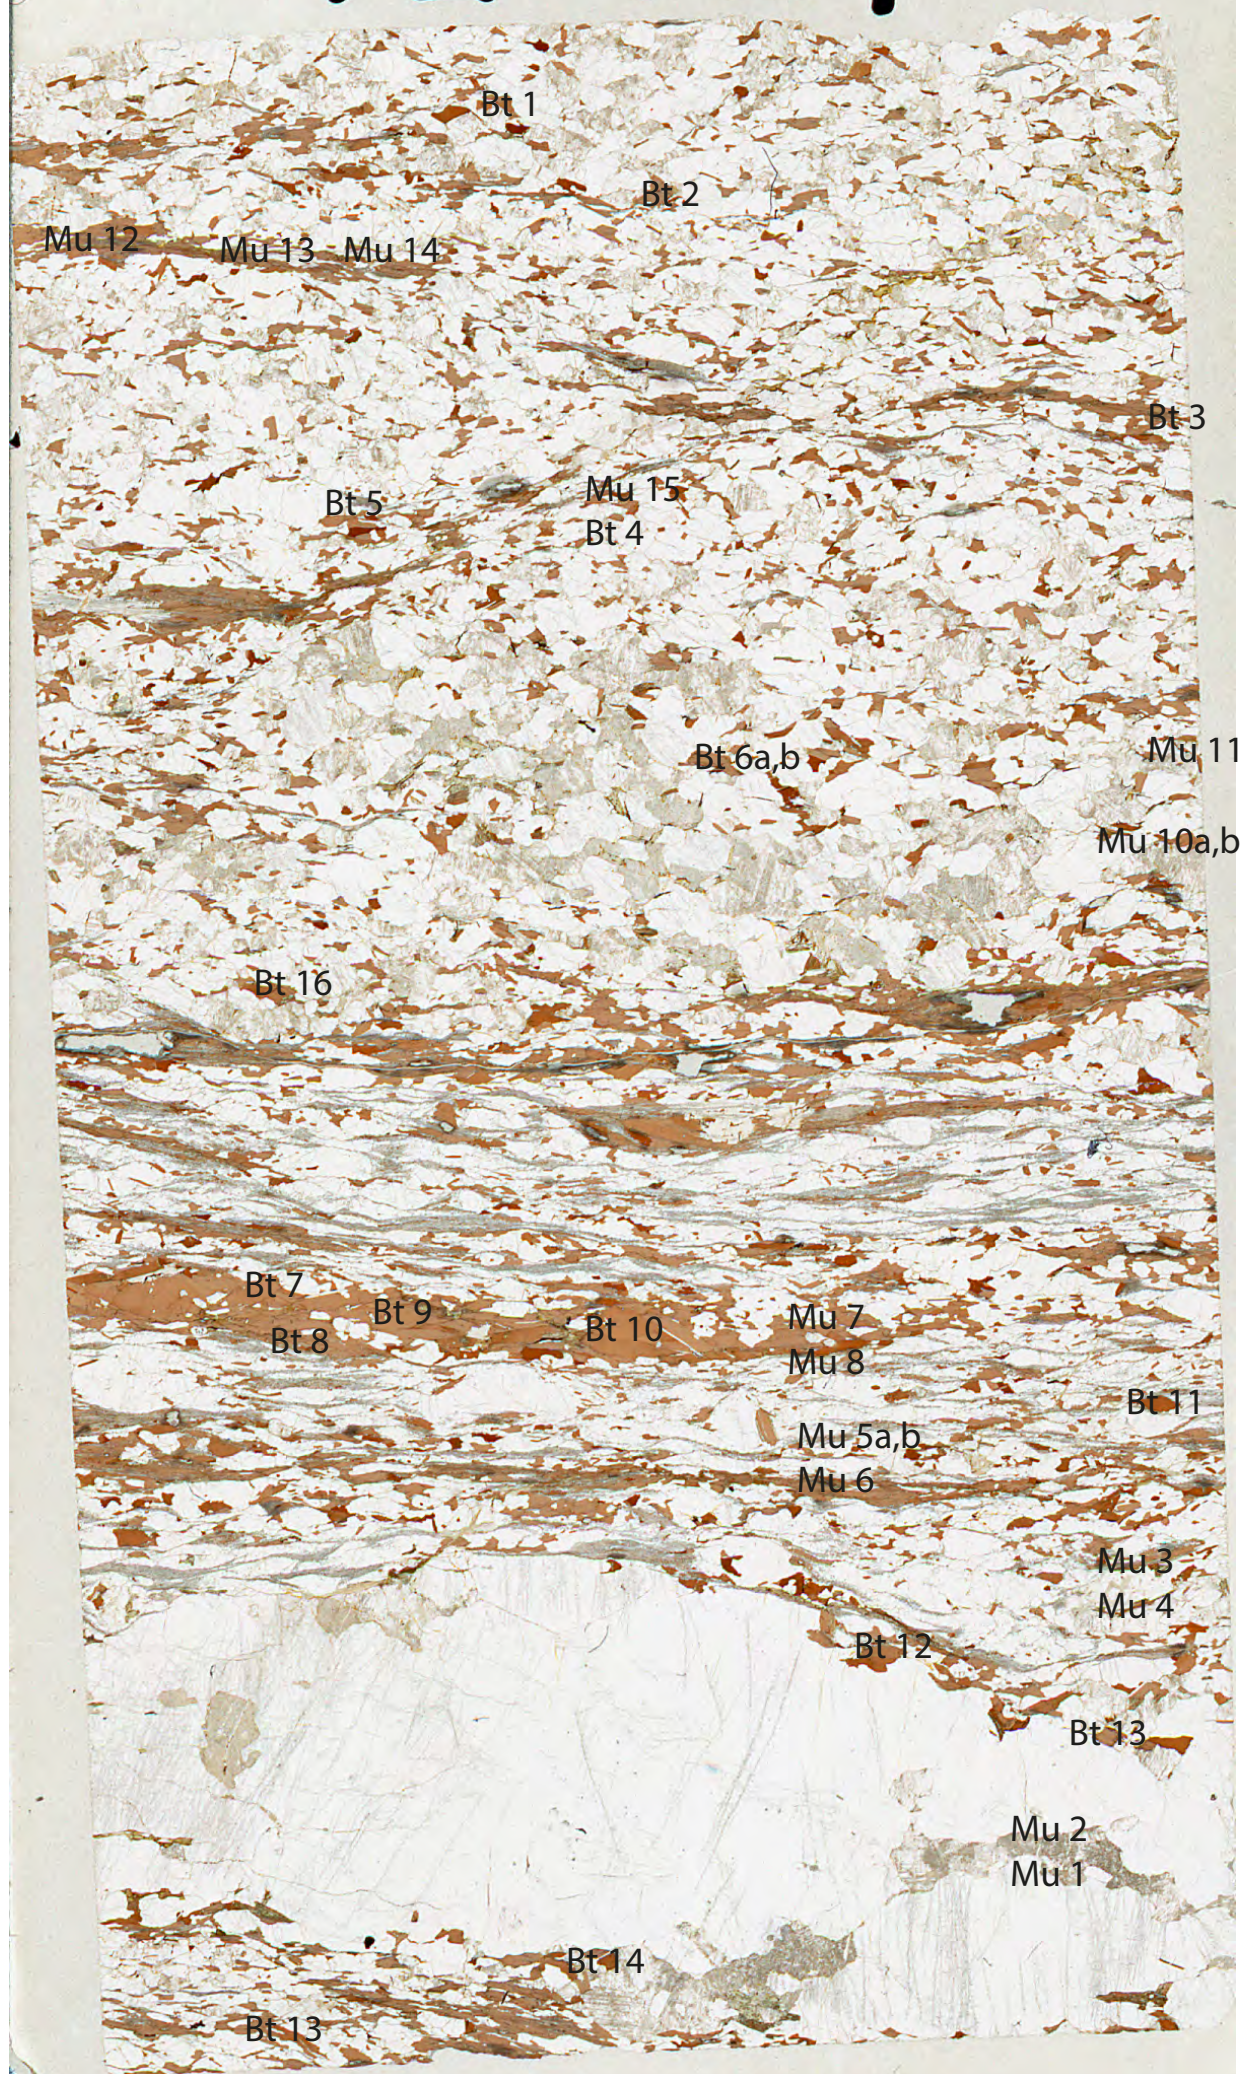



IZ422

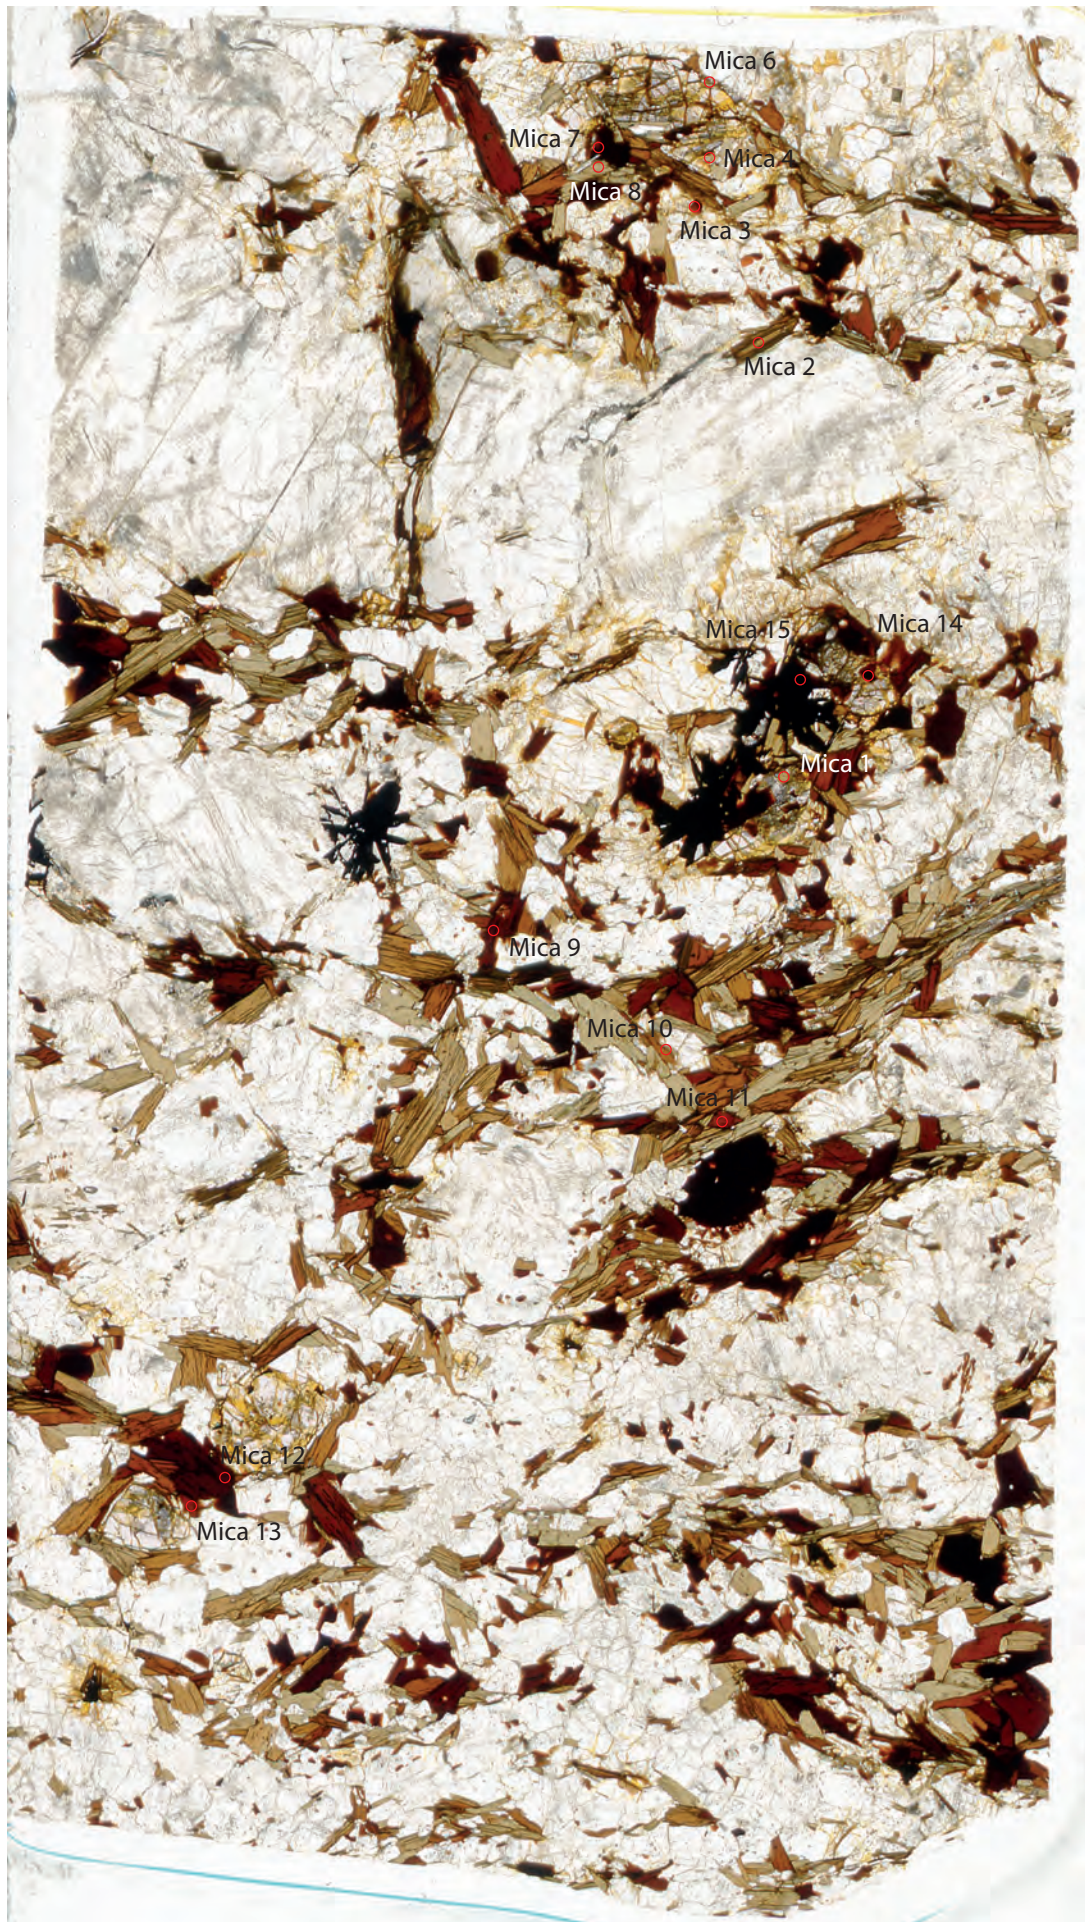



IZ409

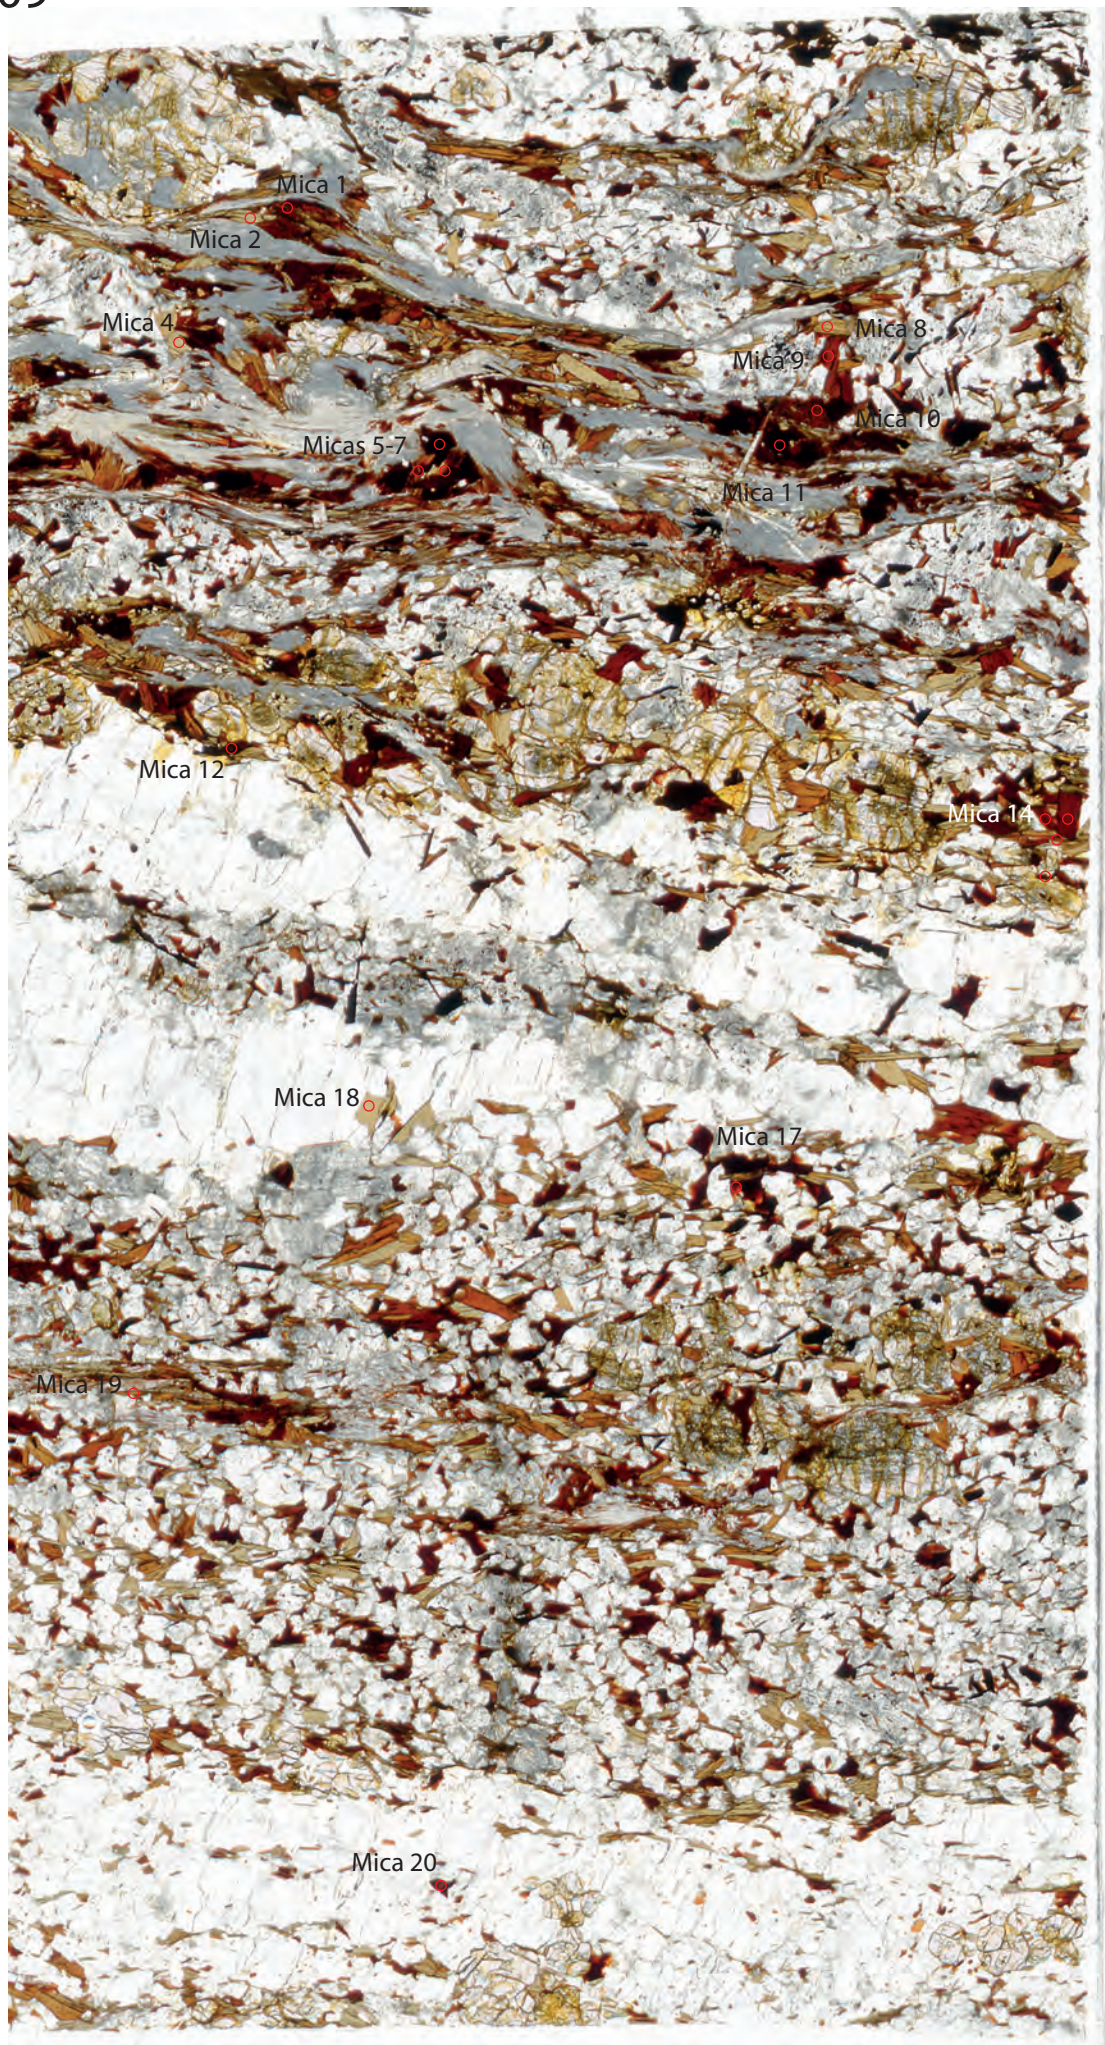

Mica 13  
Mica 15  
Mica 16



IZ407

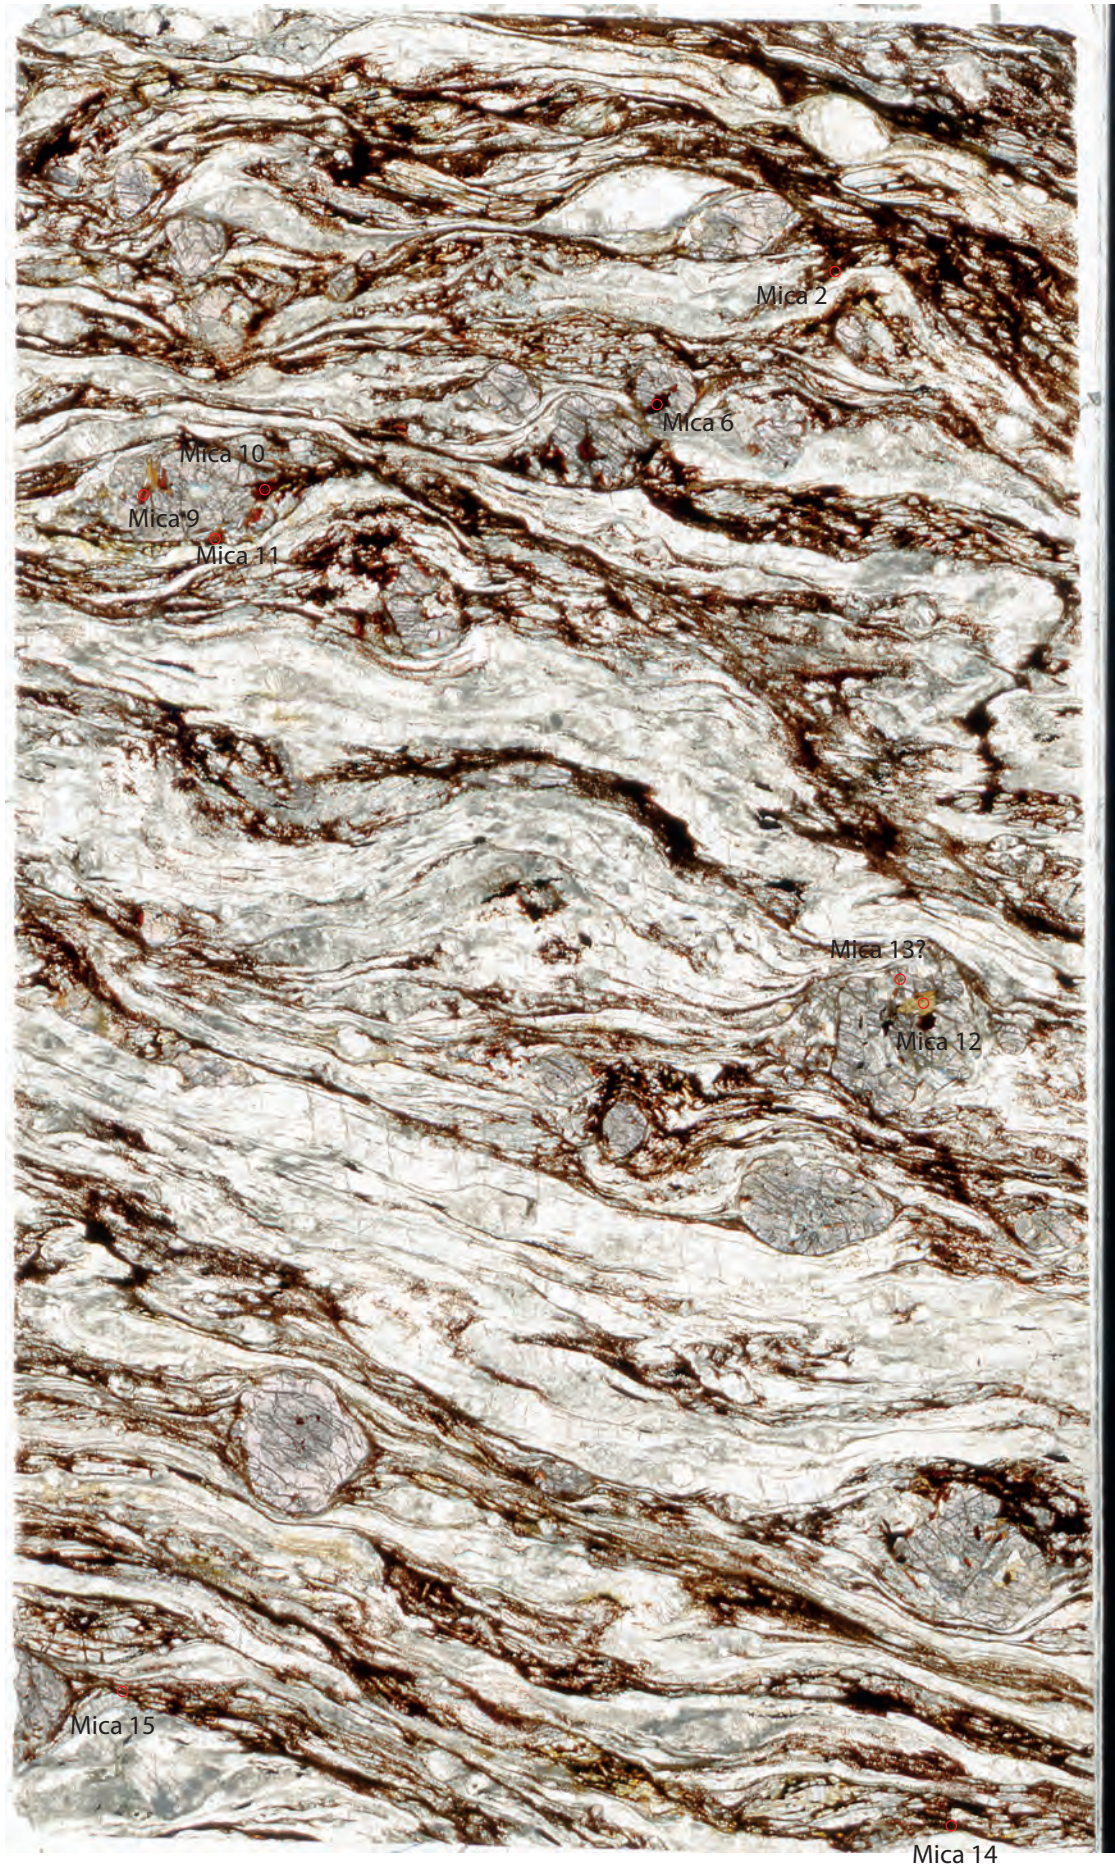



IZ 406A

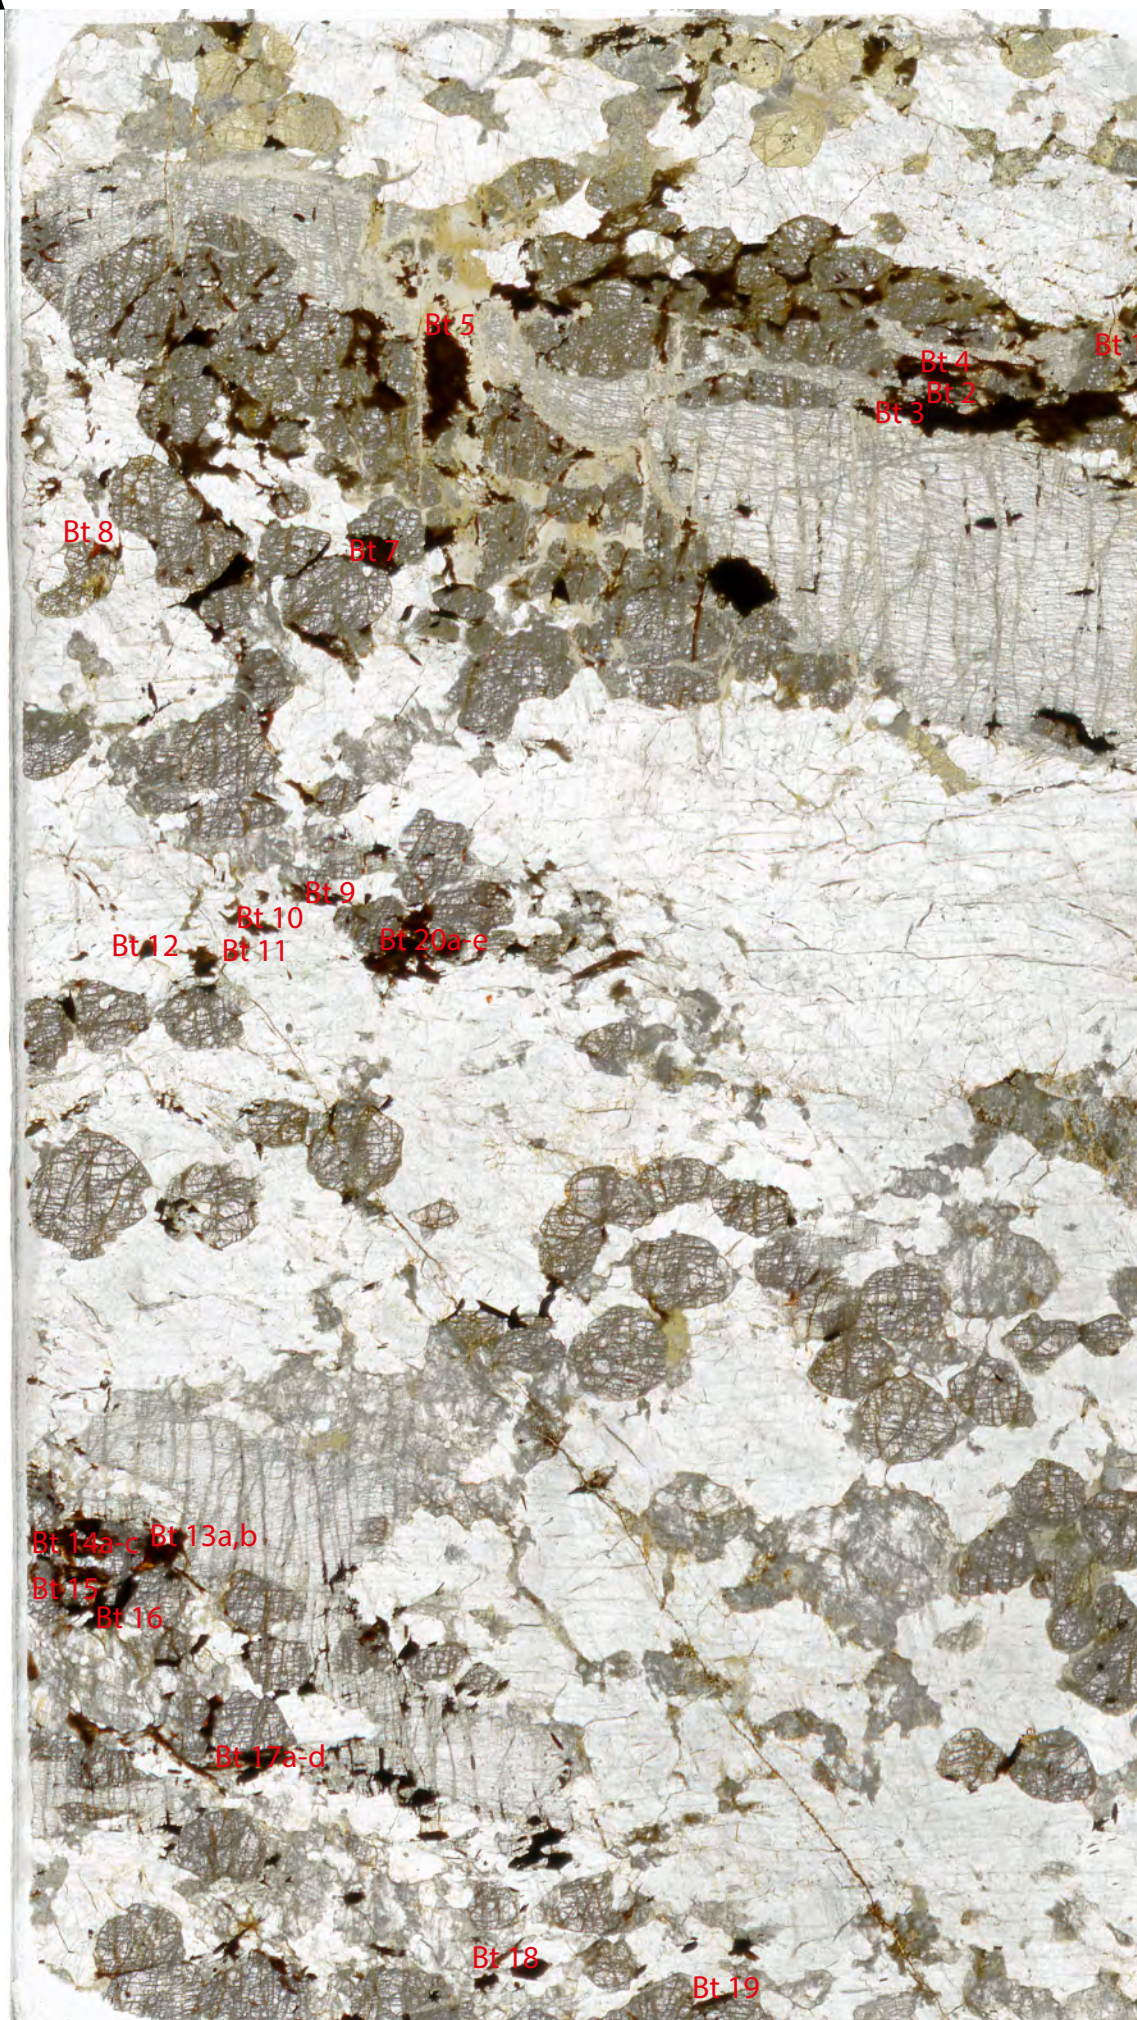



IZ405

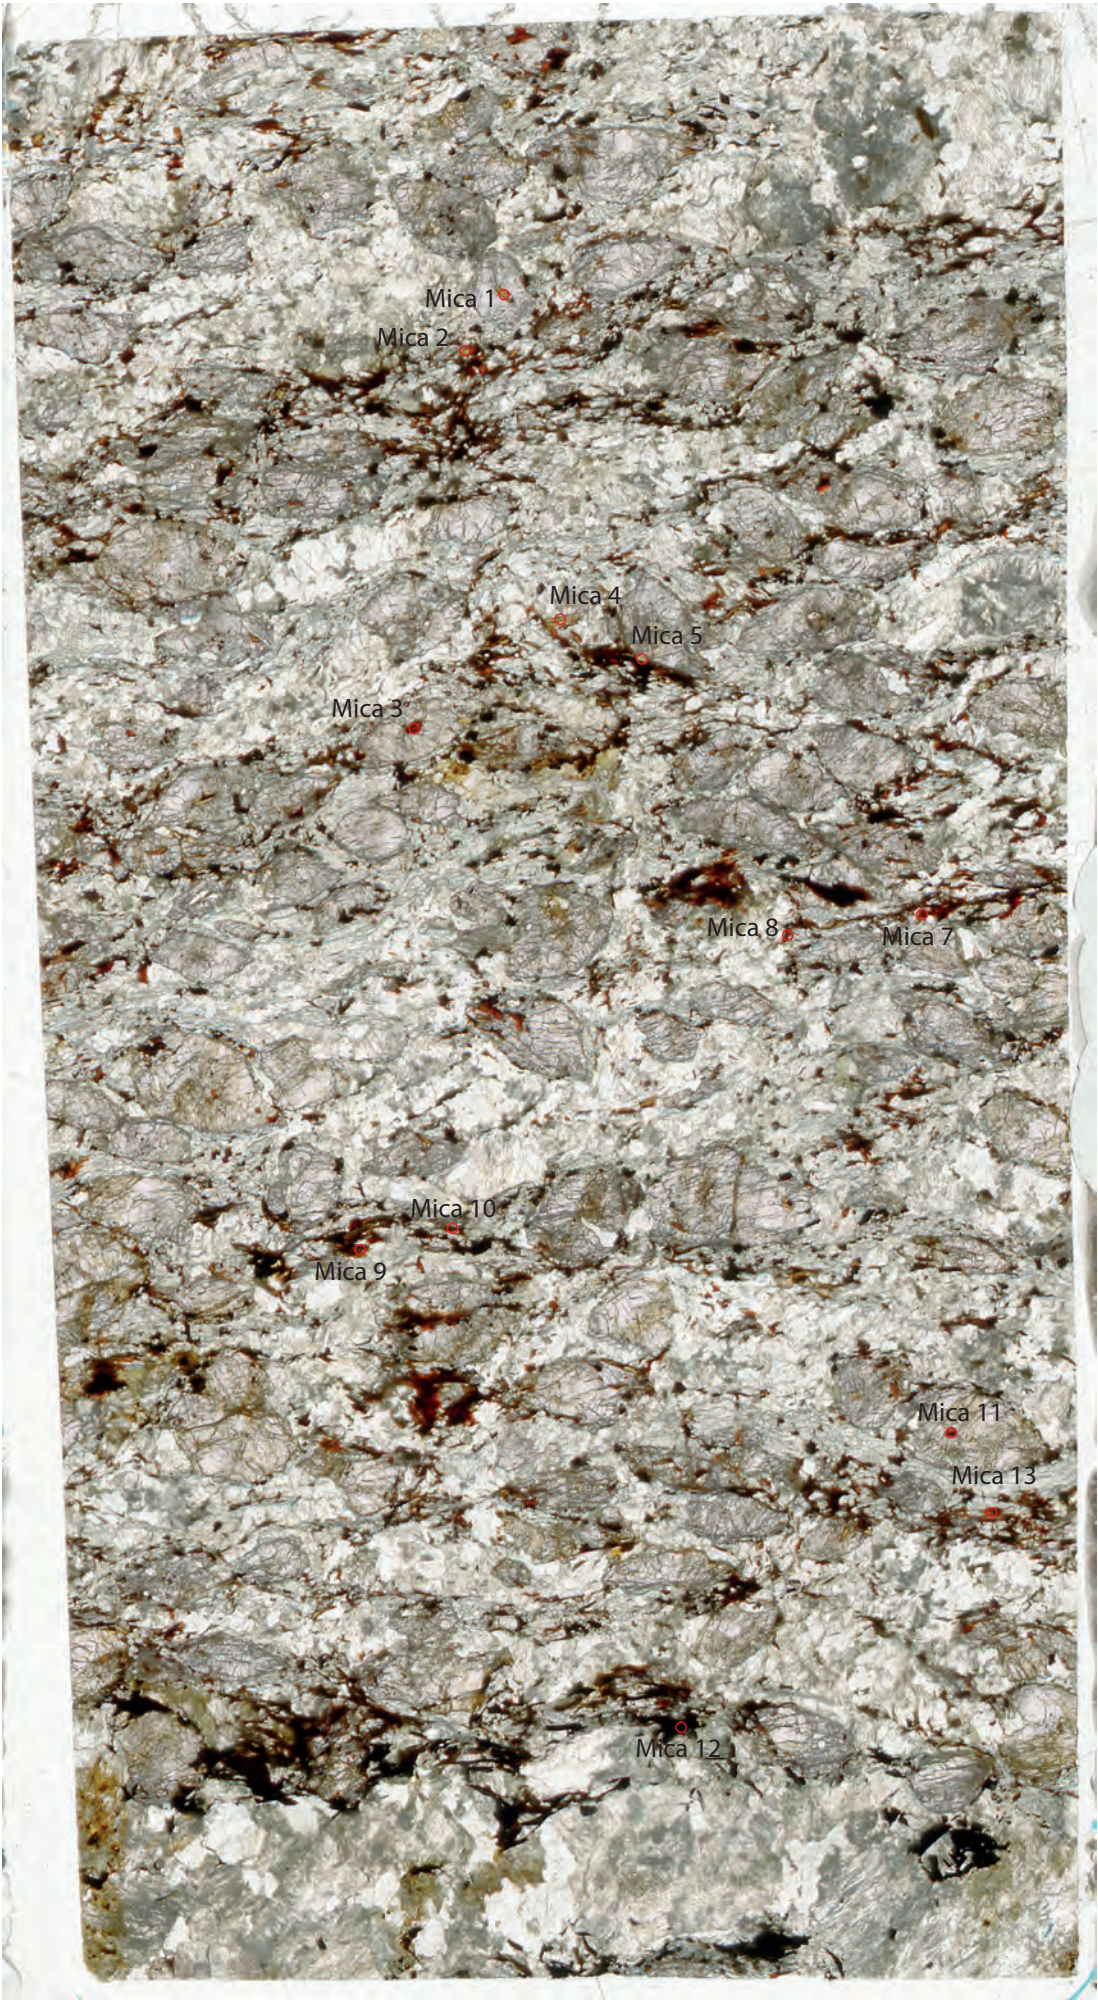

Supplement: Supplementary file 1 [file 1]
